# Supplementary material for: The organocatalytic asymmetric Neber reaction for the enantioselective synthesis of spirooxindole 2H-azirines
Source: Royal Society of Chemistry journal article supplement (doi:10.1039/c6ob02220k), 2016-01-01

# Organocatalytic asymmetric Neber reaction for the enantioselective synthesis of spirooxindole 2*H*-azirines

Jian-Qiang Zhao,<sup>a,b,c</sup> Deng-Feng Yue,<sup>a,c</sup> Xiao-Mei Zhang,<sup>a</sup> Xiao-Ying Xu<sup>\*a</sup> and Wei-Cheng Yuan<sup>\*a</sup>

<sup>a</sup>National Engineering Research Center of Chiral Drugs, Chengdu Institute of Organic Chemistry,  
Chinese Academy of Sciences, Chengdu 610041, China

<sup>b</sup>Institute for Advanced Study, Chengdu University, Chengdu 610106, China

<sup>c</sup>University of Chinese Academy of Sciences, Beijing 100049, China

xuxy@cioc.ac.cn; yuanwc@cioc.ac.cn

## Supporting Information

### Table of Contents

|                                                                                                                      |    |
|----------------------------------------------------------------------------------------------------------------------|----|
| <sup>1</sup> H NMR, <sup>13</sup> C NMR and HPLC spectra for compounds <b>3a-r</b> , <b>4</b> and <b>5</b> . . . . . | S1 |
|----------------------------------------------------------------------------------------------------------------------|----|

<sup>1</sup>H NMR, <sup>13</sup>C NMR and HPLC of compound **3a**

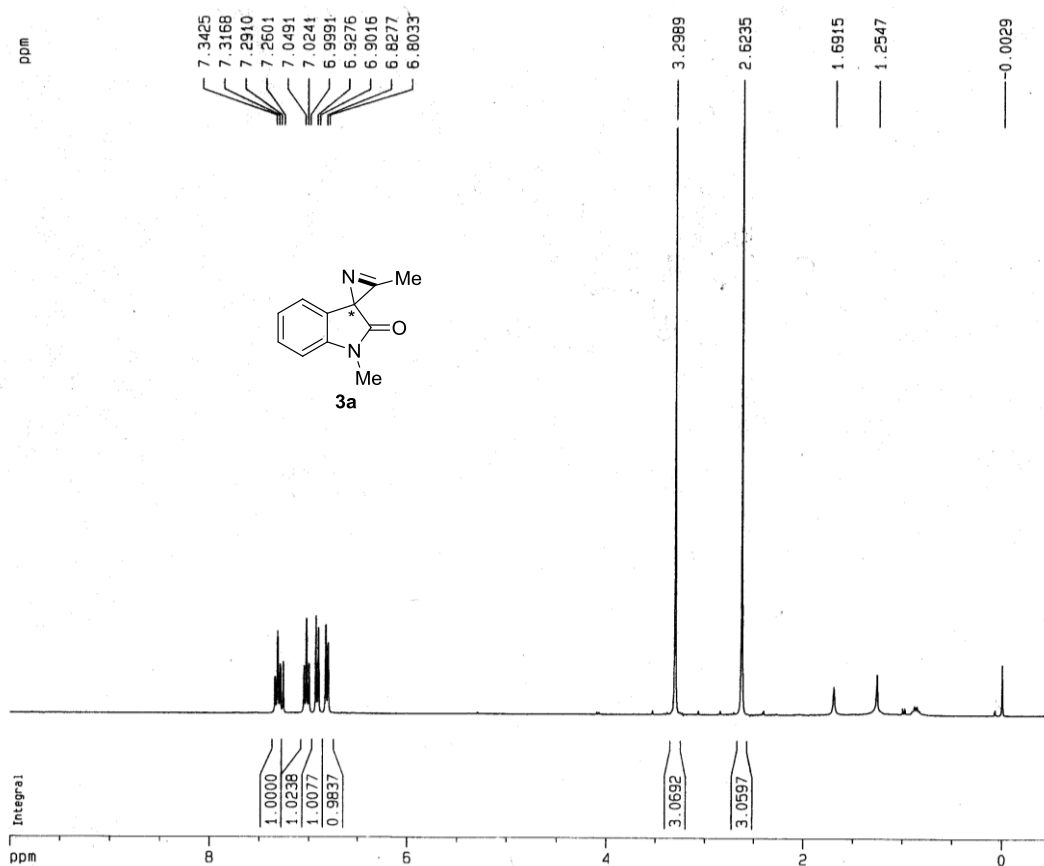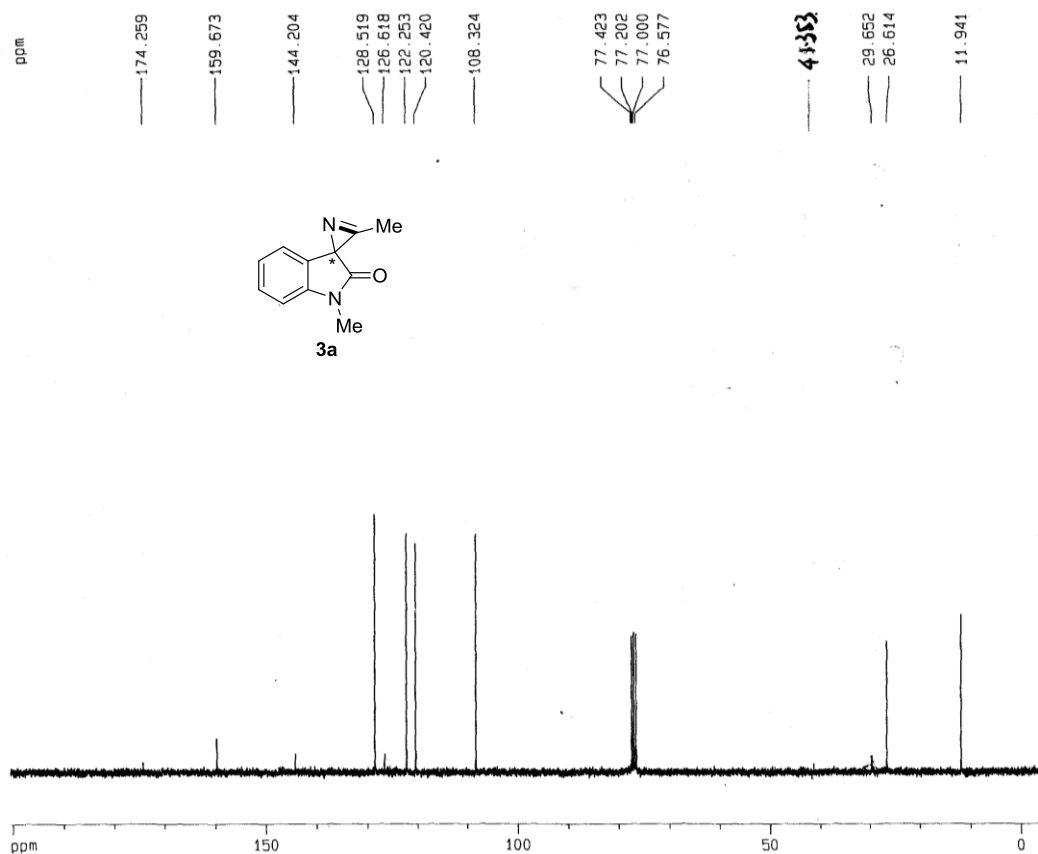

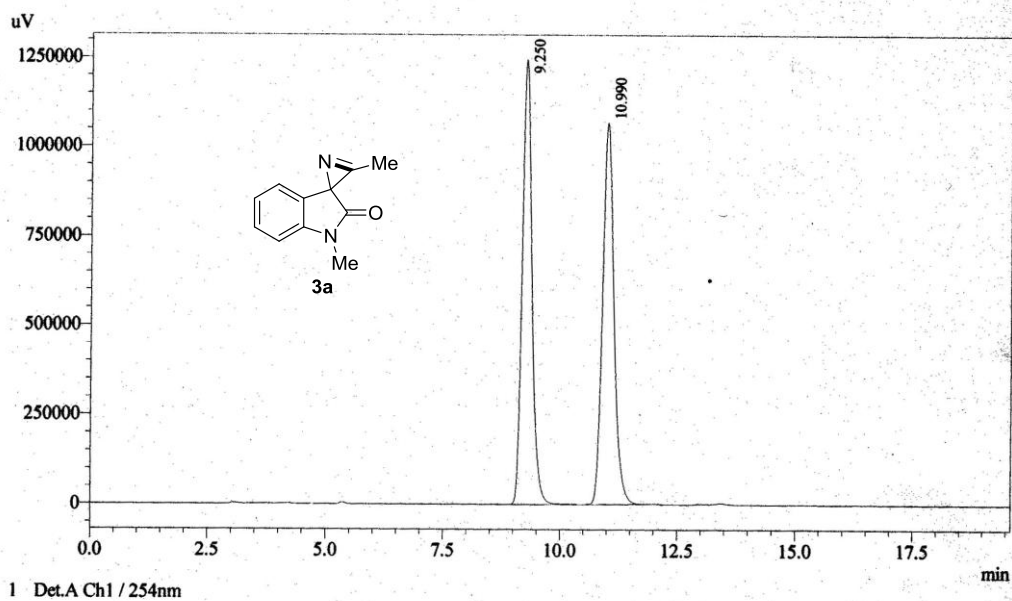

Detector A Ch1 254nm

| Peak# | Ret. Time | Area     | Height  | Area %  | Height % |
|-------|-----------|----------|---------|---------|----------|
| 1     | 9.250     | 18004853 | 1244344 | 50.020  | 53.849   |
| 2     | 10.990    | 17990386 | 1066451 | 49.980  | 46.151   |
| Total |           | 35995238 | 2310795 | 100.000 | 100.000  |

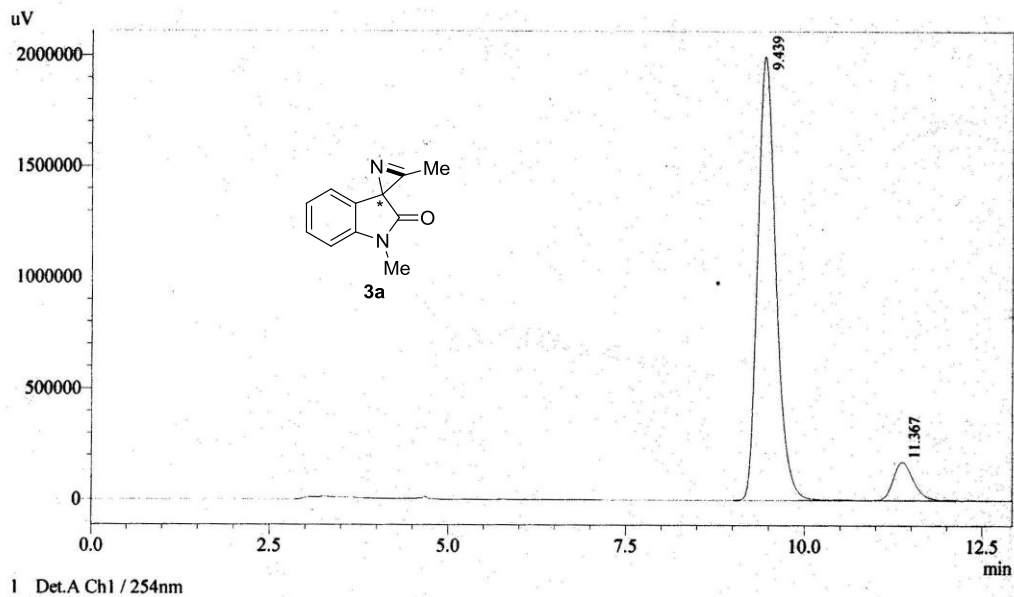

Detector A Ch1 254nm

| Peak# | Ret. Time | Area     | Height  | Area %  | Height % |
|-------|-----------|----------|---------|---------|----------|
| 1     | 9.439     | 35399586 | 1998453 | 91.254  | 92.048   |
| 2     | 11.367    | 3392648  | 172640  | 8.746   | 7.952    |
| Total |           | 38792234 | 2171093 | 100.000 | 100.000  |

<sup>1</sup>H NMR, <sup>13</sup>C NMR and HPLC of compound **3b**

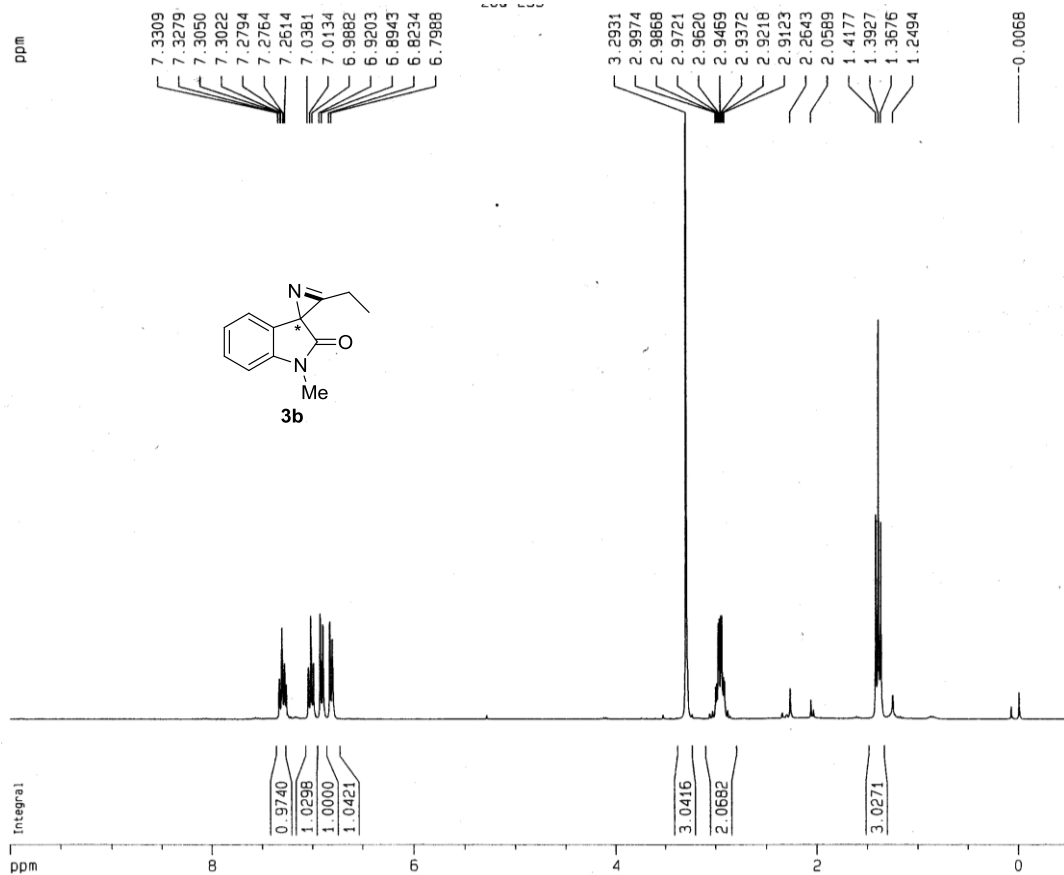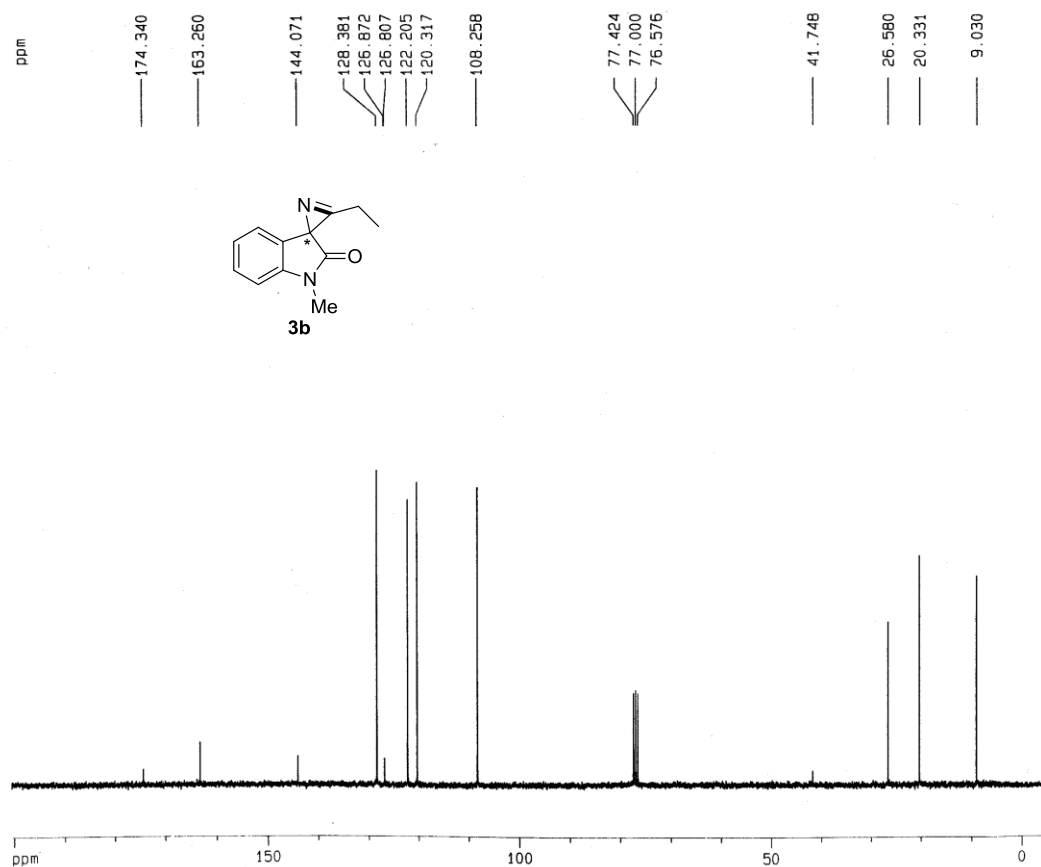

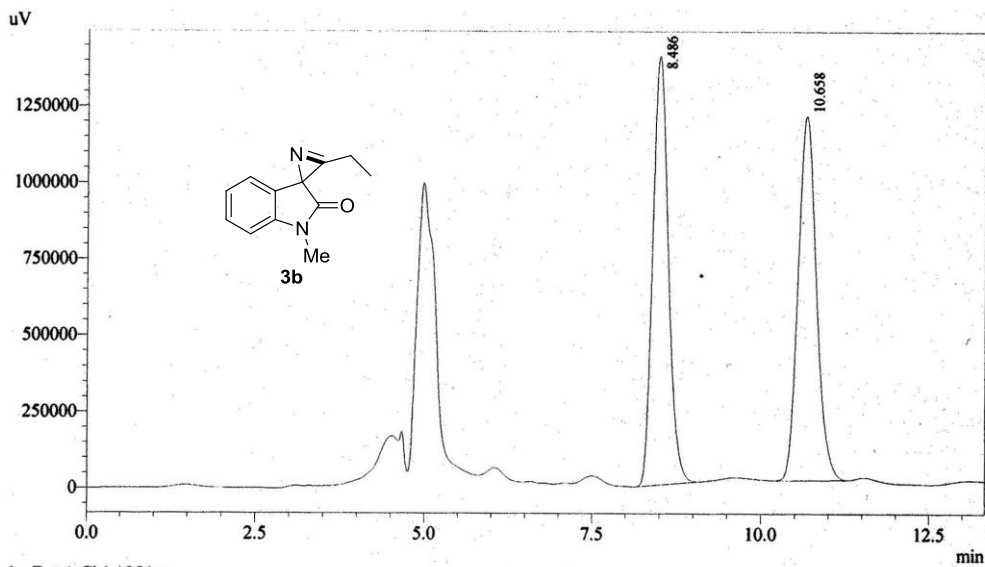

1 Det.A Ch1 / 254nm

Detector A Ch1 254nm

| Peak# | Ret. Time | Area     | Height  | Area %  | Height % |
|-------|-----------|----------|---------|---------|----------|
| 1     | 8.486     | 22591969 | 1404235 | 50.061  | 54.084   |
| 2     | 10.658    | 22537174 | 1192140 | 49.939  | 45.916   |
| Total |           | 45129143 | 2596374 | 100.000 | 100.000  |

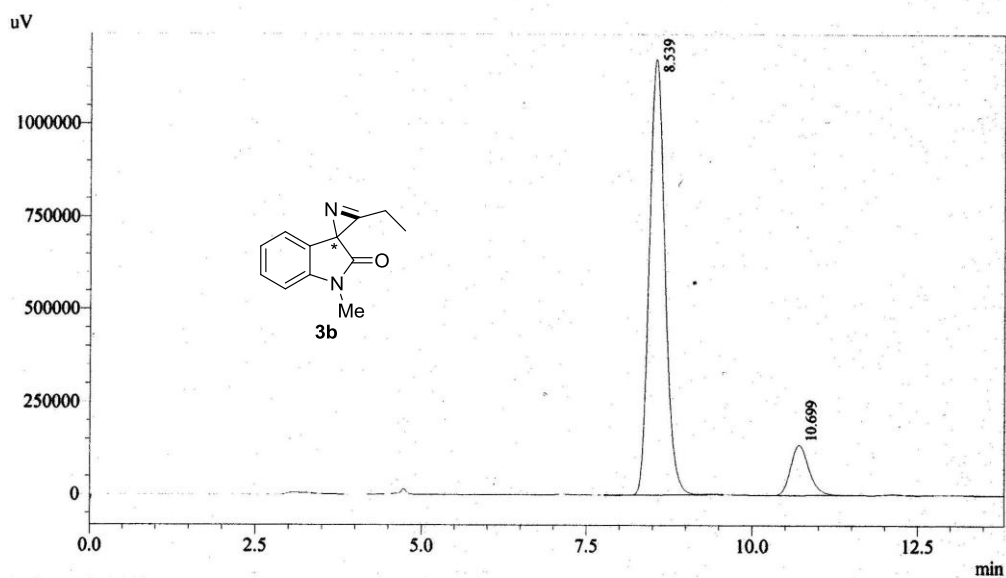

1 Det.A Ch1 / 254nm

Detector A Ch1 254nm

| Peak# | Ret. Time | Area     | Height  | Area %  | Height % |
|-------|-----------|----------|---------|---------|----------|
| 1     | 8.539     | 19395513 | 1175611 | 88.264  | 89.697   |
| 2     | 10.699    | 2578983  | 135032  | 11.736  | 10.303   |
| Total |           | 21974496 | 1310644 | 100.000 | 100.000  |

<sup>1</sup>H NMR, <sup>13</sup>C NMR and HPLC of compound **3c**

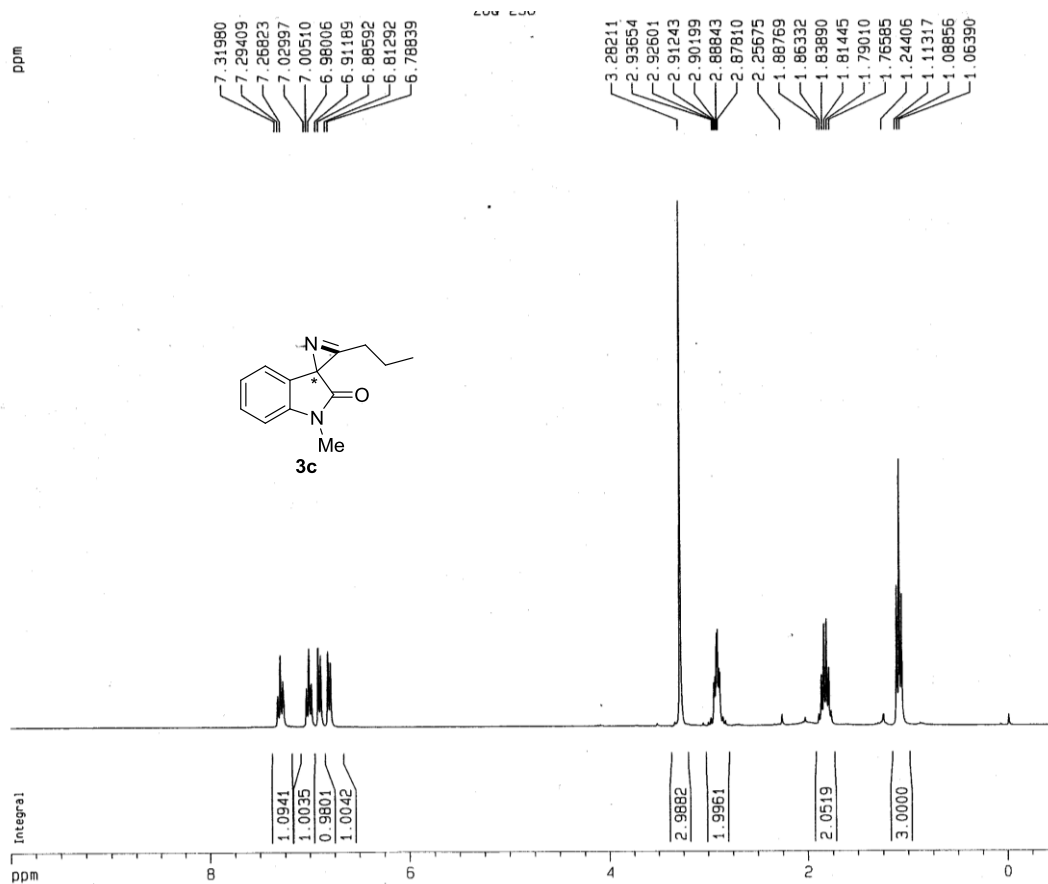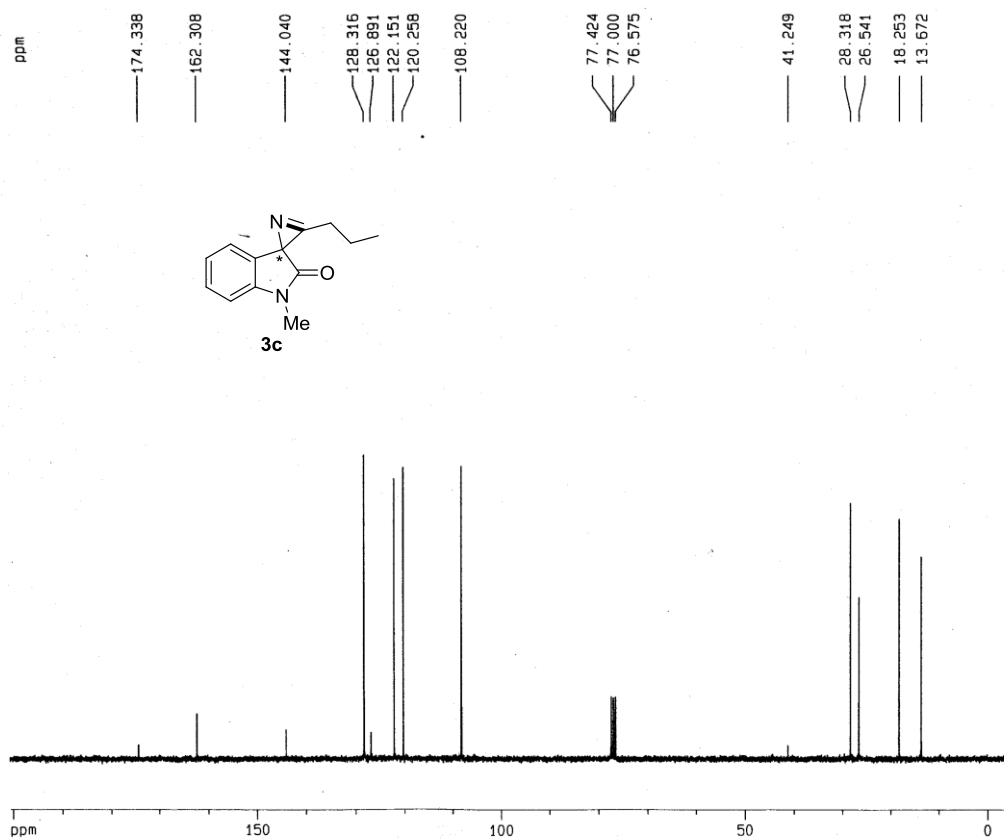

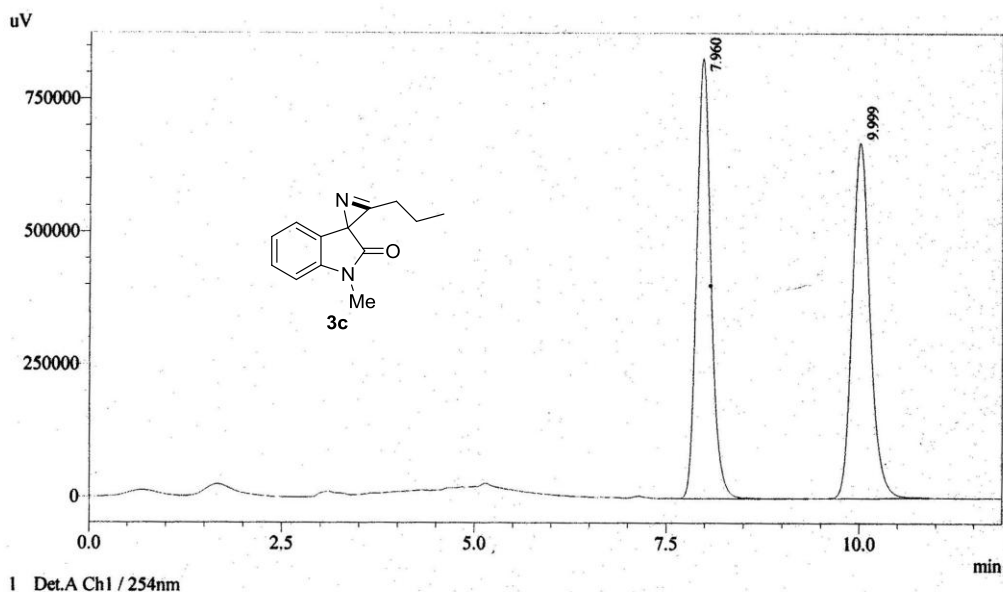

1 Det.A Ch1 / 254nm

Detector A Ch1 254nm

| Peak# | Ret. Time | Area     | Height  | Area %  | Height % |
|-------|-----------|----------|---------|---------|----------|
| 1     | 7.960     | 10764459 | 830394  | 49.922  | 55.382   |
| 2     | 9.999     | 10797934 | 669010  | 50.078  | 44.618   |
| Total |           | 21562393 | 1499404 | 100.000 | 100.000  |

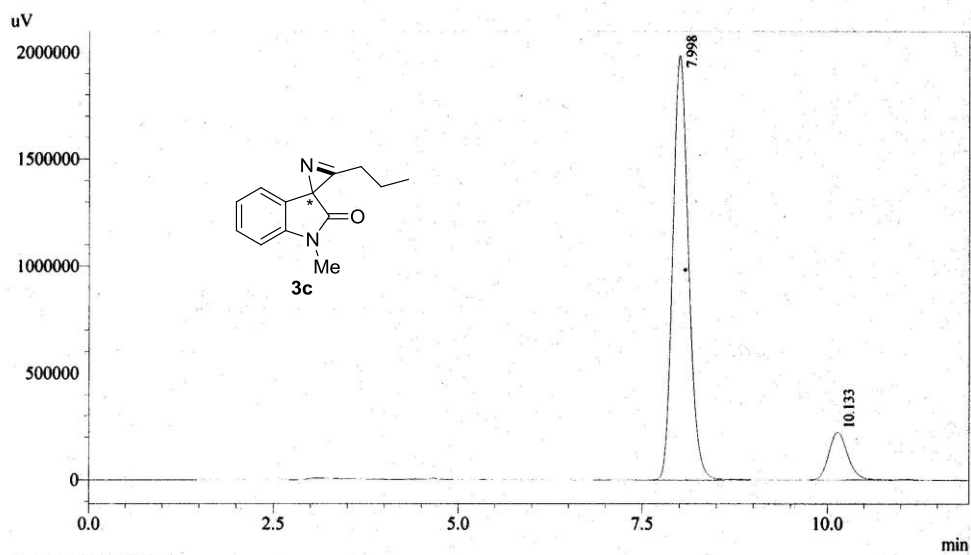

1 Det.A Ch1 / 254nm

Detector A Ch1 254nm

| Peak# | Ret. Time | Area     | Height  | Area %  | Height % |
|-------|-----------|----------|---------|---------|----------|
| 1     | 7.998     | 29402626 | 1987583 | 87.941  | 89.883   |
| 2     | 10.133    | 4031987  | 223723  | 12.059  | 10.117   |
| Total |           | 33434613 | 2211306 | 100.000 | 100.000  |

<sup>1</sup>H NMR, <sup>13</sup>C NMR and HPLC of compound **3d**

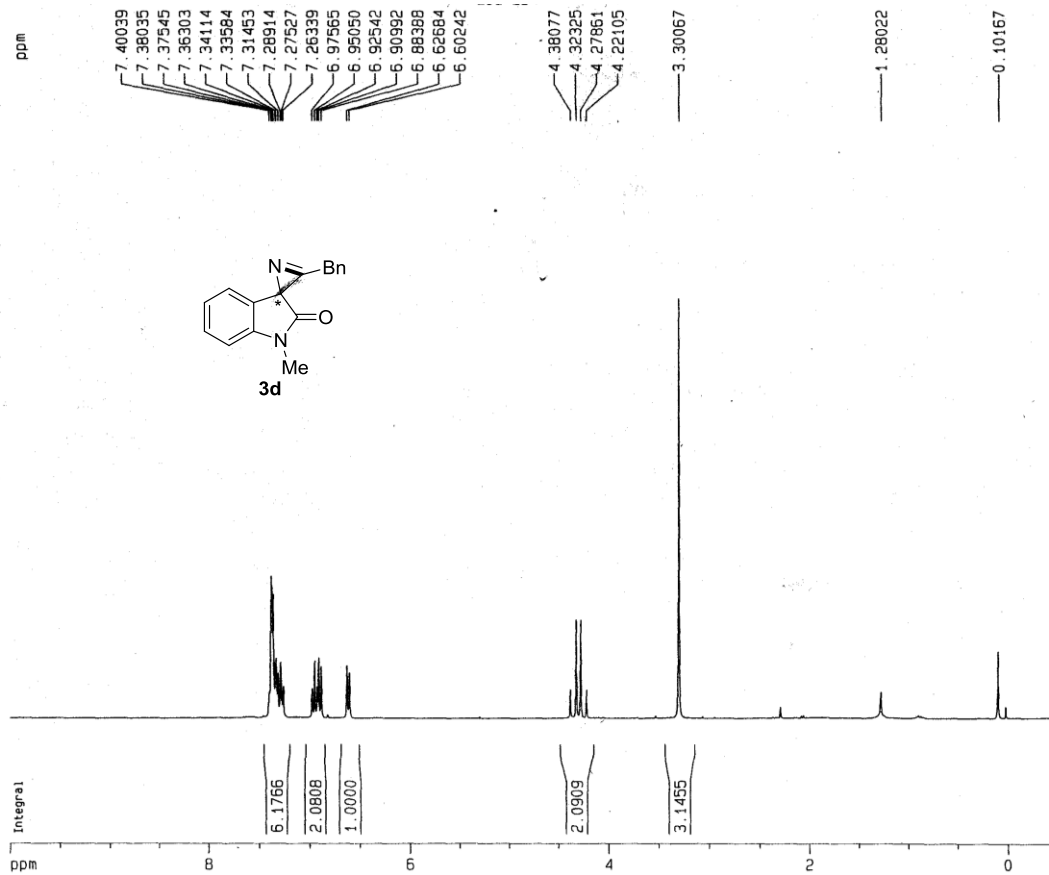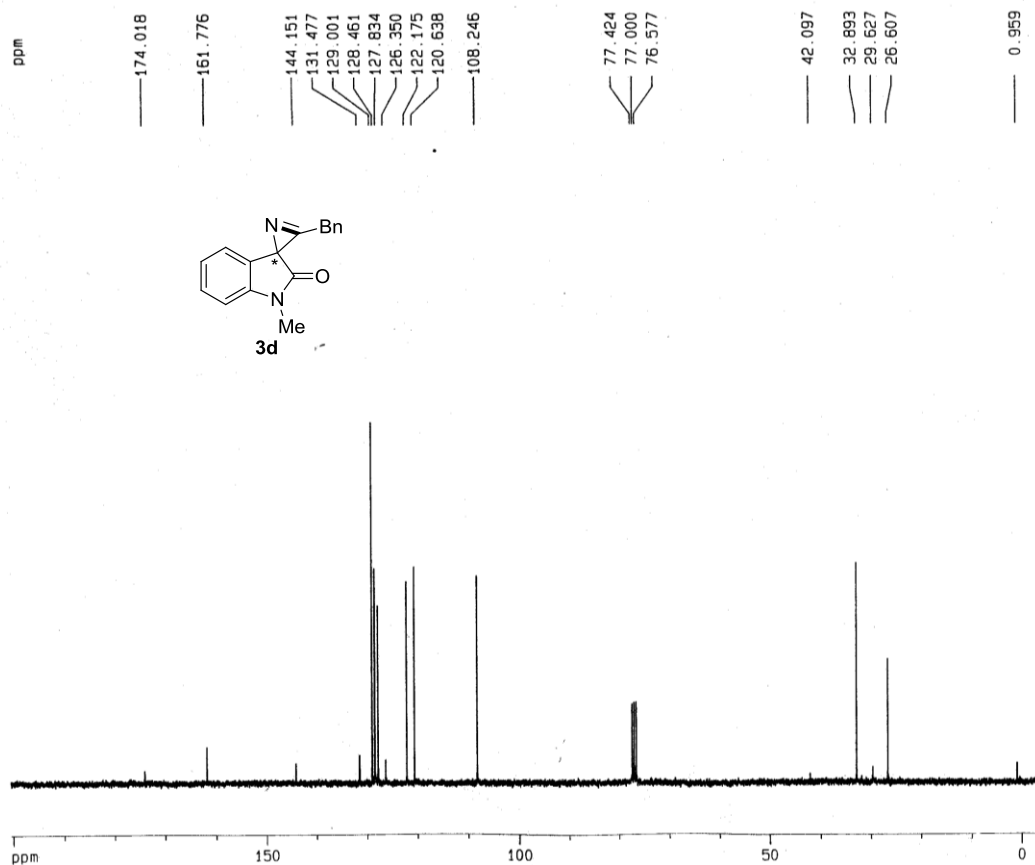



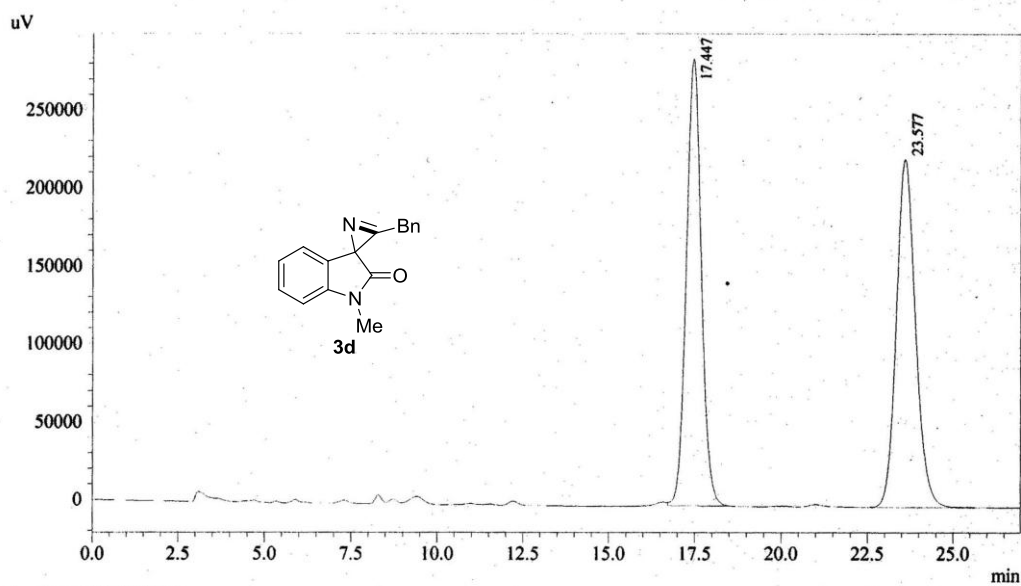

1 Det.A Ch1 / 254nm

Detector A Ch1 254nm

| Peak# | Ret. Time | Area     | Height | Area %  | Height % |
|-------|-----------|----------|--------|---------|----------|
| 1     | 17.447    | 8698689  | 287015 | 49.933  | 56.233   |
| 2     | 23.577    | 8722074  | 223389 | 50.067  | 43.767   |
| Total |           | 17420762 | 510405 | 100.000 | 100.000  |

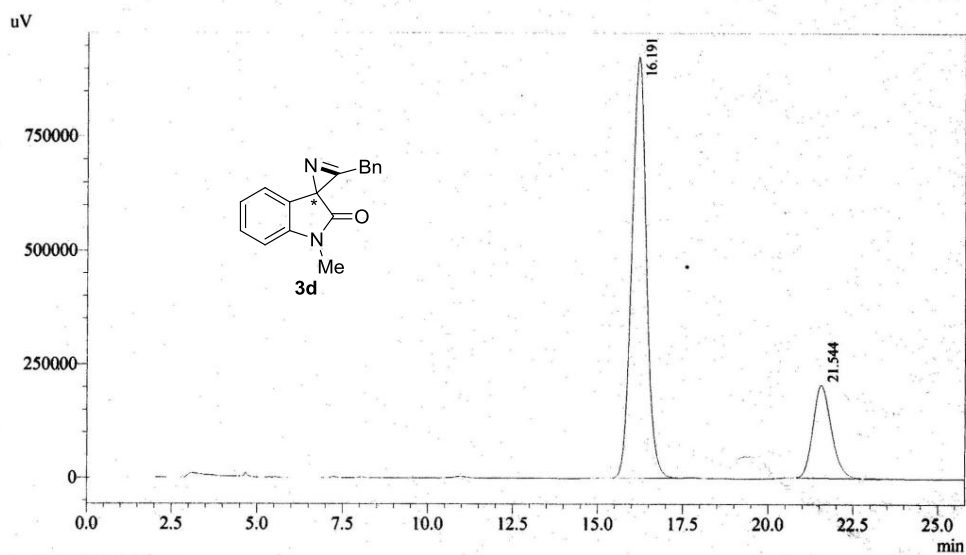

1 Det.A Ch1 / 254nm

Detector A Ch1 254nm

| Peak# | Ret. Time | Area     | Height  | Area %  | Height % |
|-------|-----------|----------|---------|---------|----------|
| 1     | 16.191    | 27588914 | 926915  | 78.150  | 81.879   |
| 2     | 21.544    | 7713730  | 205134  | 21.850  | 18.121   |
| Total |           | 35302644 | 1132050 | 100.000 | 100.000  |

<sup>1</sup>H NMR, <sup>13</sup>C NMR and HPLC of compound **3e**

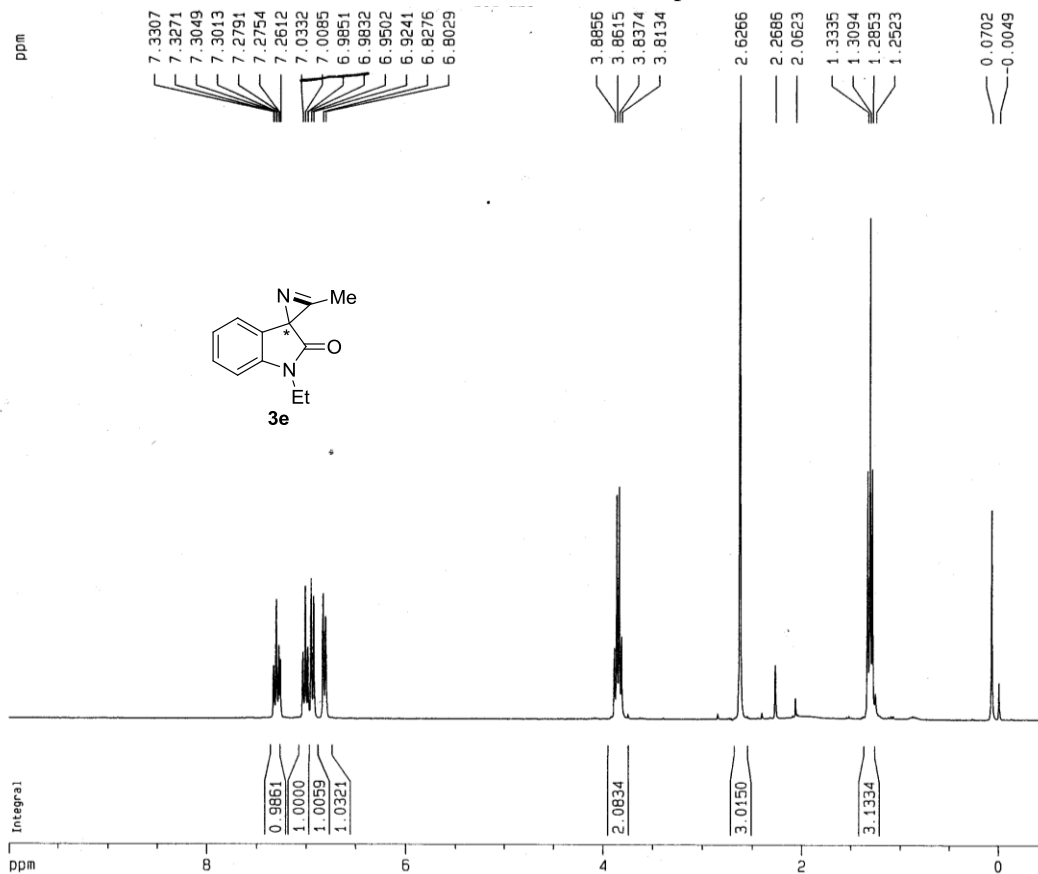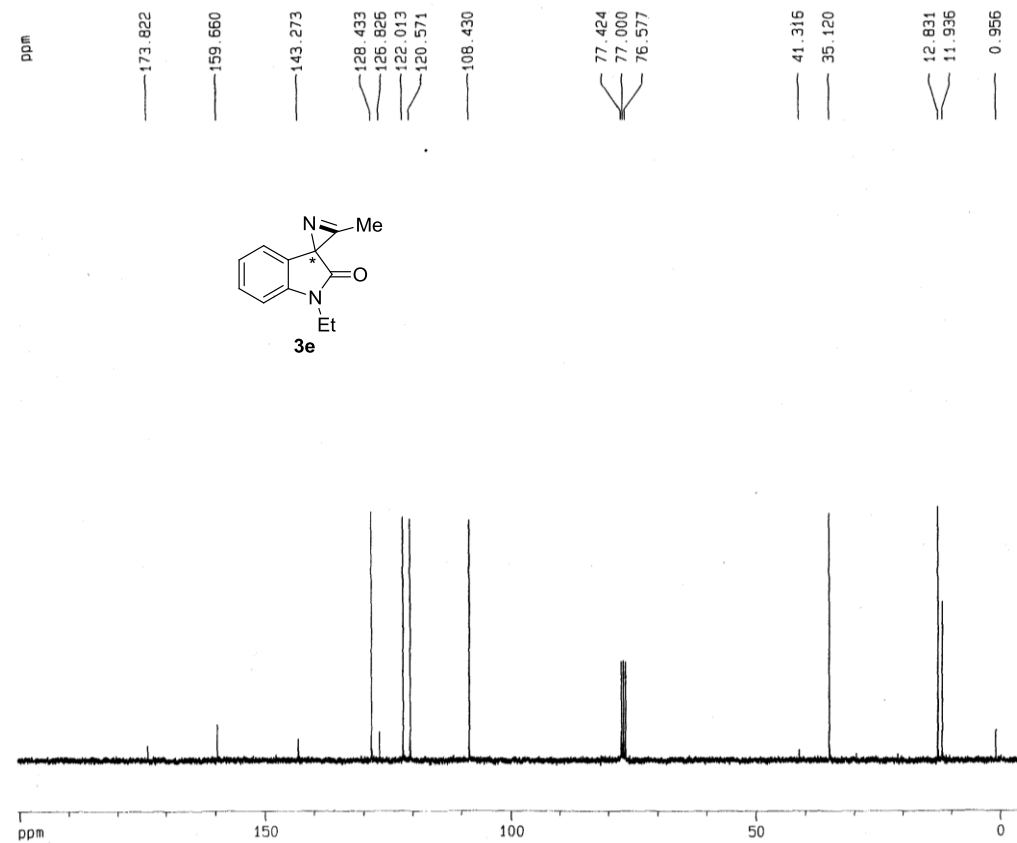

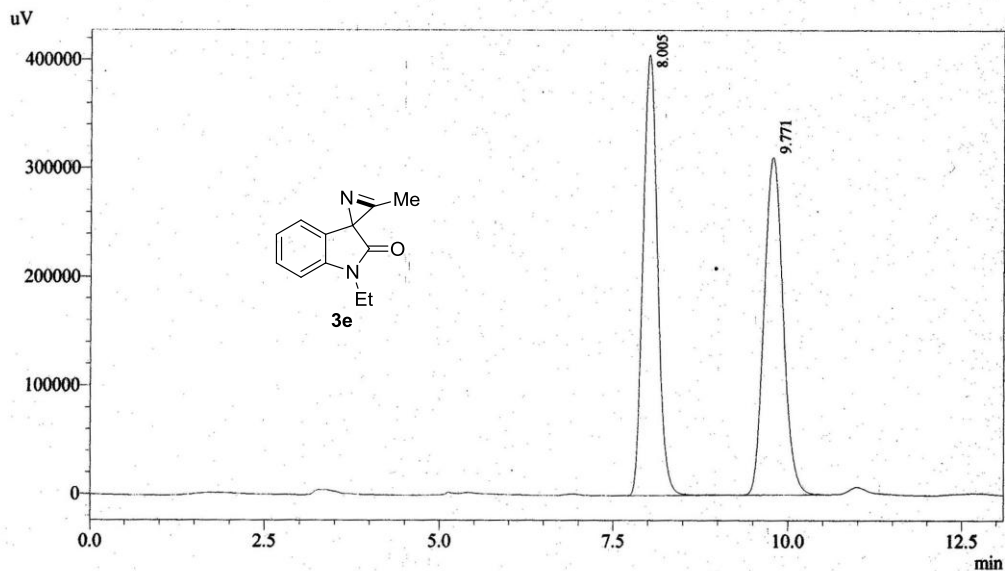

1 Det.A Ch1 / 254nm

Detector A Ch1 254nm

| Peak# | Ret. Time | Area     | Height | Area %  | Height % |
|-------|-----------|----------|--------|---------|----------|
| 1     | 8.005     | 5886324  | 405921 | 50.025  | 56.623   |
| 2     | 9.771     | 5880337  | 310966 | 49.975  | 43.377   |
| Total |           | 11766661 | 716887 | 100.000 | 100.000  |

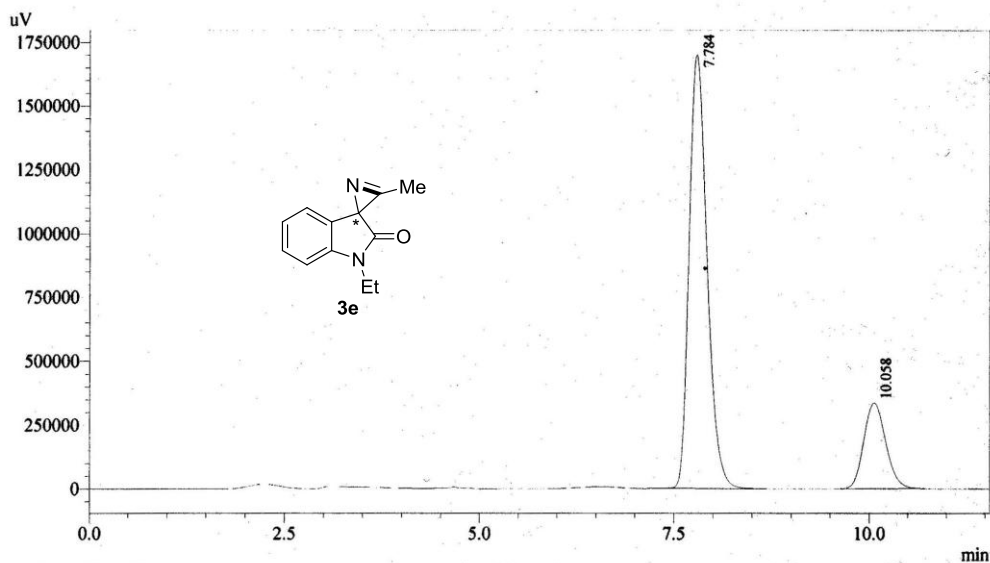

1 Det.A Ch1 / 254nm

Detector A Ch1 254nm

| Peak# | Ret. Time | Area     | Height  | Area %  | Height % |
|-------|-----------|----------|---------|---------|----------|
| 1     | 7.784     | 27104988 | 1699726 | 80.316  | 83.483   |
| 2     | 10.058    | 6642870  | 336278  | 19.684  | 16.517   |
| Total |           | 33747858 | 2036004 | 100.000 | 100.000  |

<sup>1</sup>H NMR, <sup>13</sup>C NMR and HPLC of compound **3f**

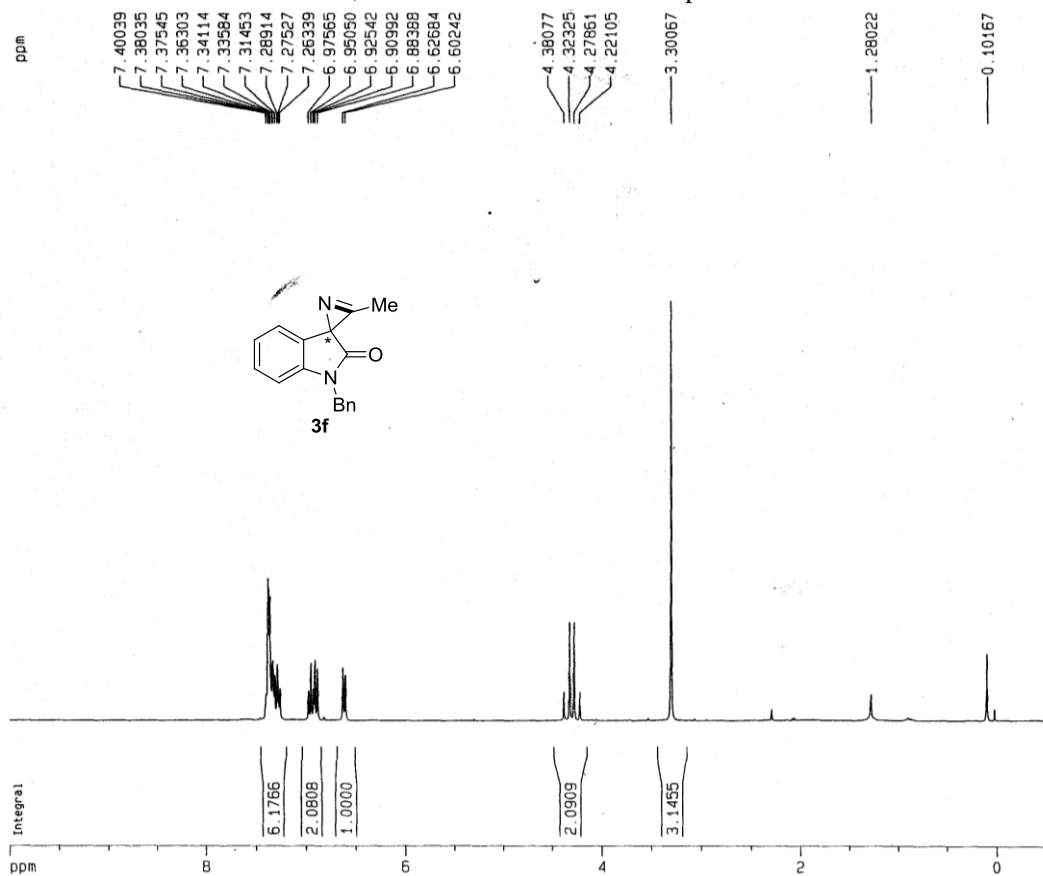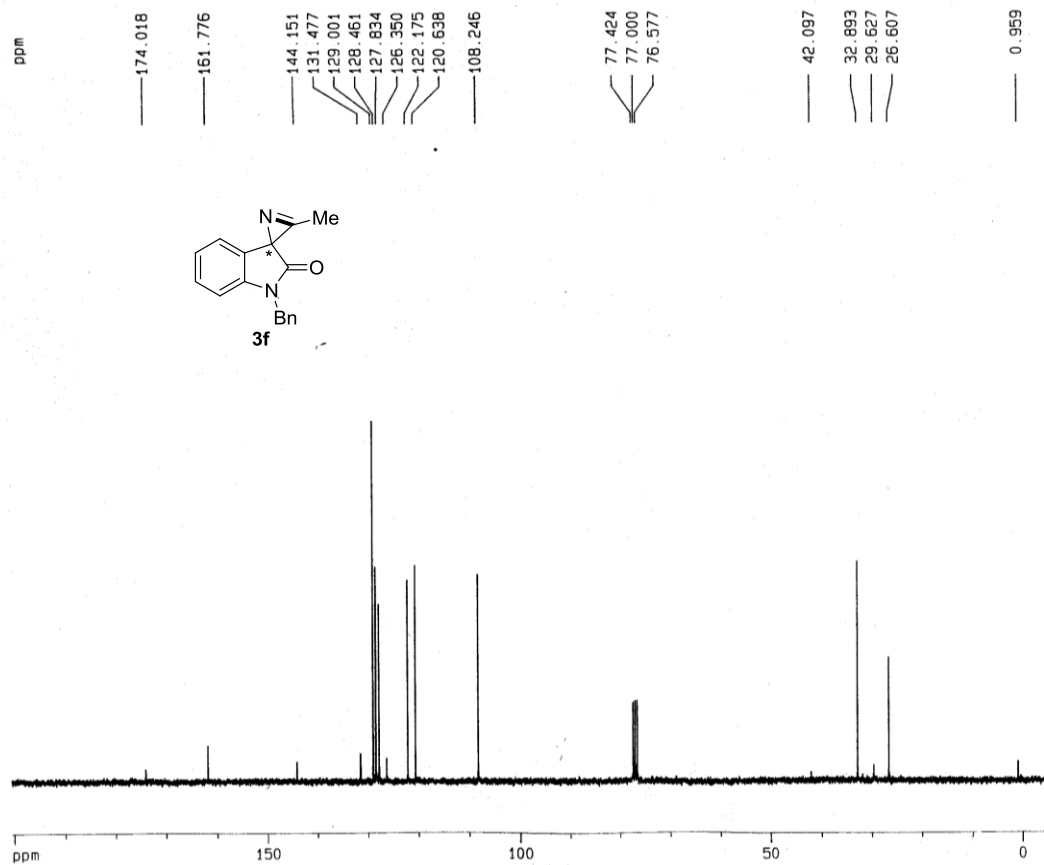

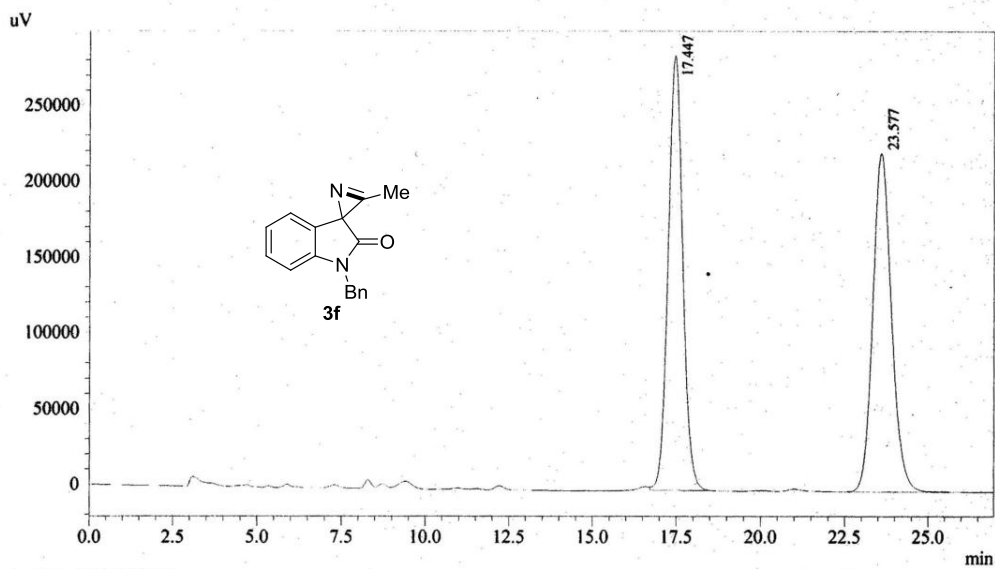

Detector A Ch1 254nm

| Peak# | Ret. Time | Area     | Height | Area %  | Height % |
|-------|-----------|----------|--------|---------|----------|
| 1     | 17.447    | 8698689  | 287015 | 49.933  | 56.233   |
| 2     | 23.577    | 8722074  | 223389 | 50.067  | 43.767   |
| Total |           | 17420762 | 510405 | 100.000 | 100.000  |

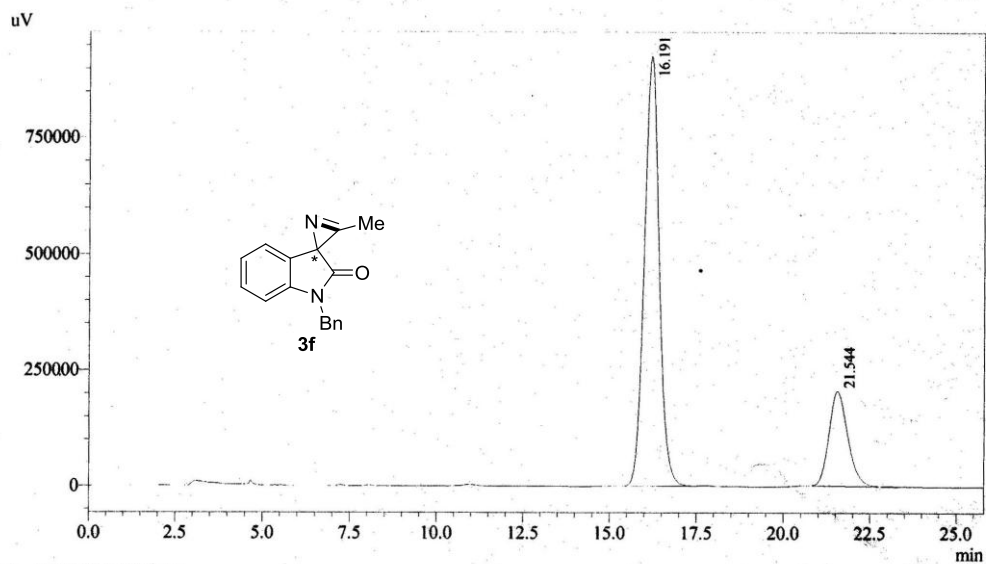

Detector A Ch1 254nm

| Peak# | Ret. Time | Area     | Height  | Area %  | Height % |
|-------|-----------|----------|---------|---------|----------|
| 1     | 16.191    | 27588914 | 926915  | 78.150  | 81.879   |
| 2     | 21.544    | 7713730  | 205134  | 21.850  | 18.121   |
| Total |           | 35302644 | 1132050 | 100.000 | 100.000  |

<sup>1</sup>H NMR, <sup>13</sup>C NMR and HPLC of compound **3g**

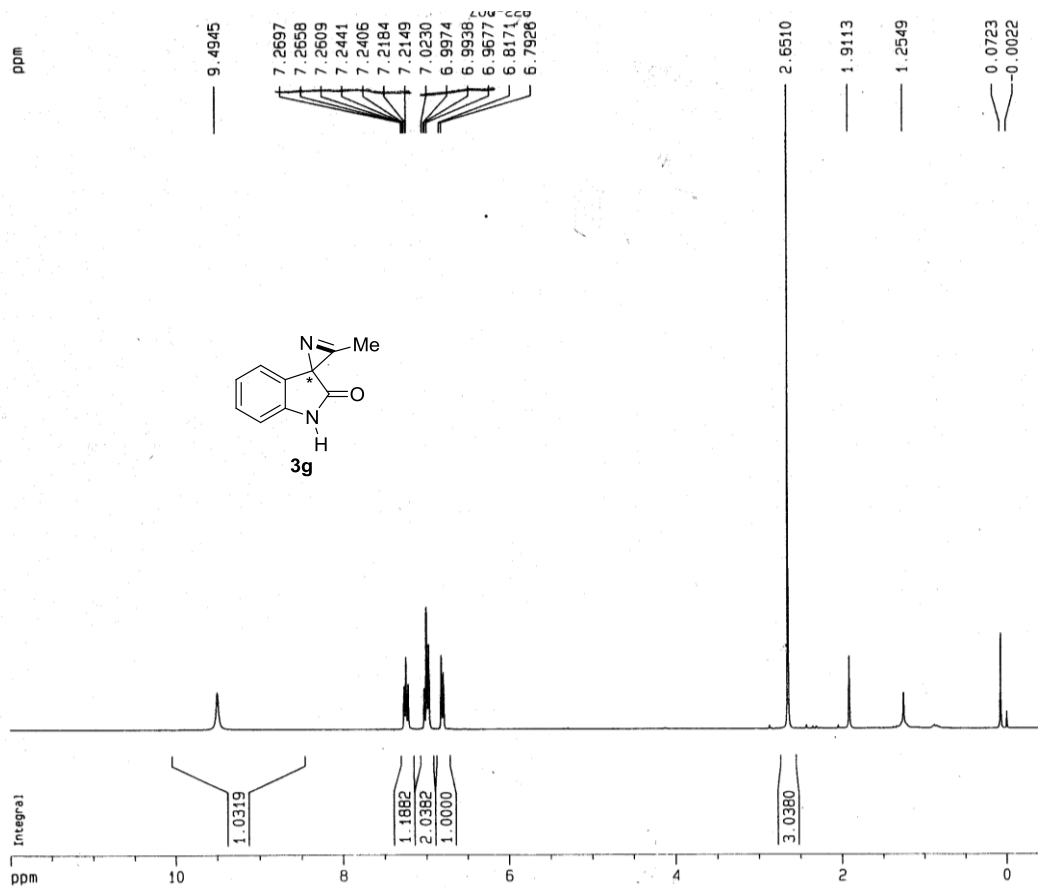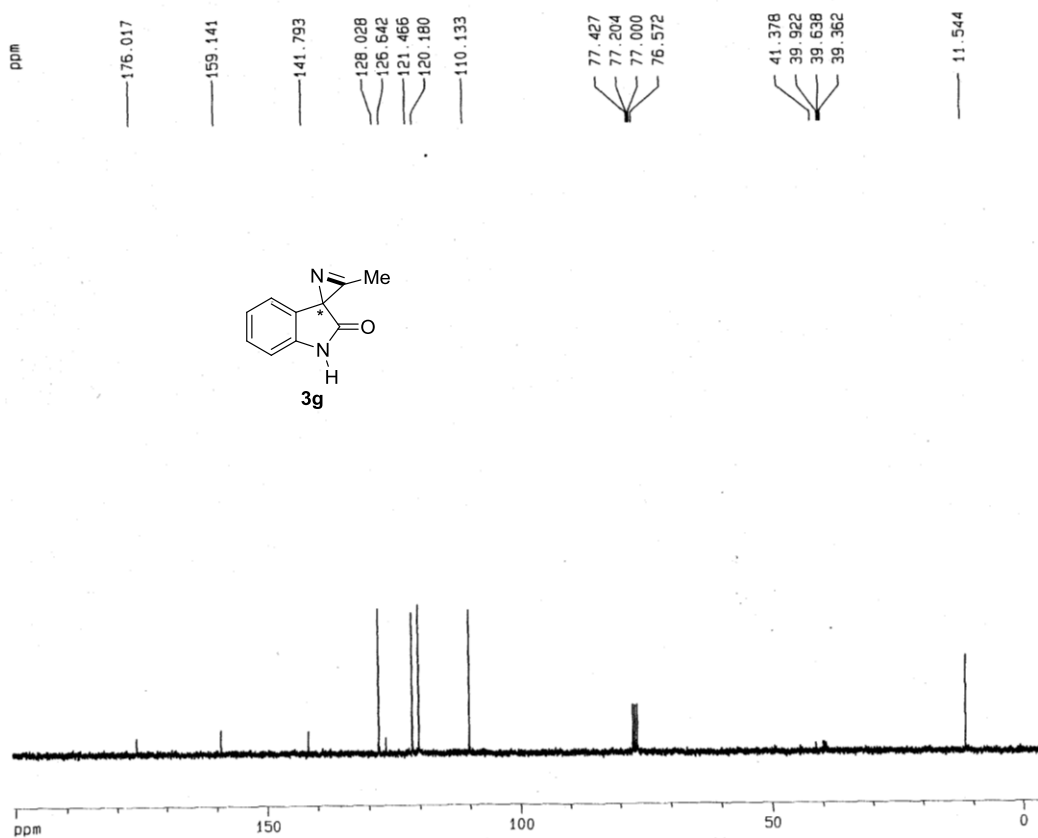

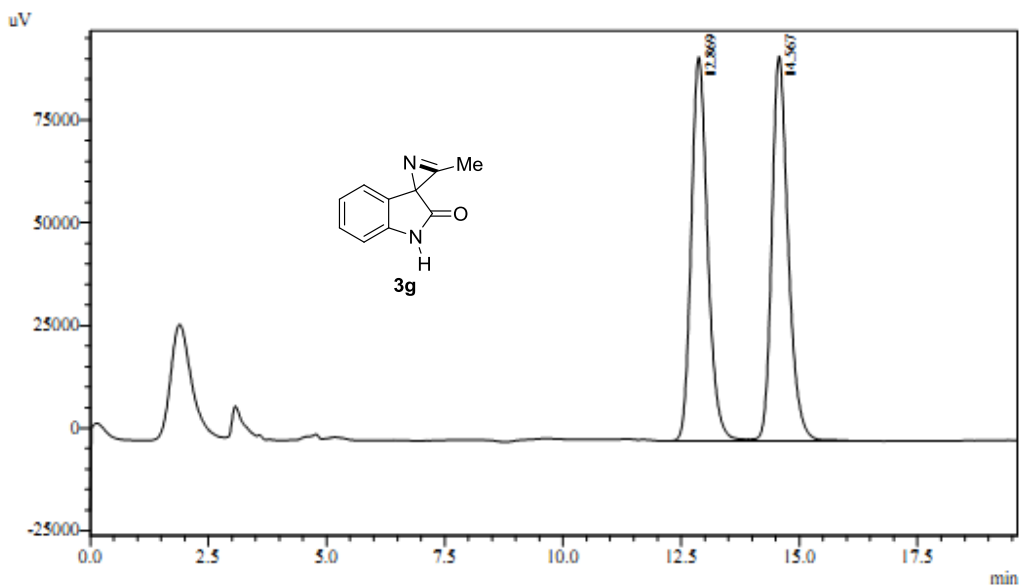

1 Det.A Ch1 / 254nm

Detector A Ch1 254nm

| Peak# | Ret. Time | Area    | Height | Area %  | Height % |
|-------|-----------|---------|--------|---------|----------|
| 1     | 12.869    | 2260509 | 93582  | 49.923  | 49.950   |
| 2     | 14.567    | 2267481 | 93770  | 50.077  | 50.050   |
| Total |           | 4527990 | 187351 | 100.000 | 100.000  |

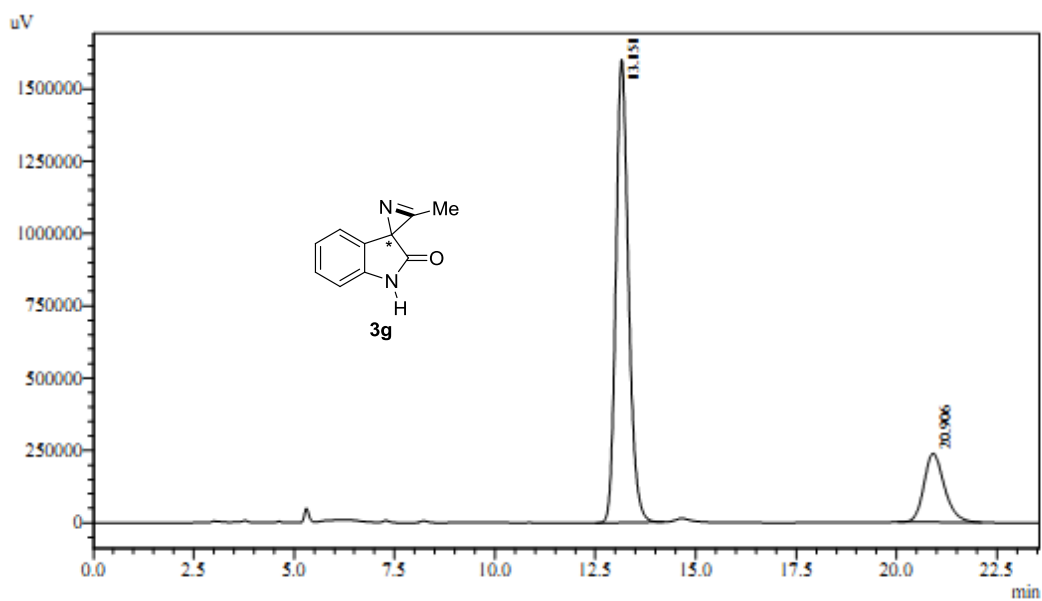

1 Det.A Ch1 / 254nm

Detector A Ch1 254nm

| Peak# | Ret. Time | Area     | Height  | Area %  | Height % |
|-------|-----------|----------|---------|---------|----------|
| 1     | 13.151    | 35012379 | 1601170 | 80.528  | 87.109   |
| 2     | 20.906    | 8466231  | 236955  | 19.472  | 12.891   |
| Total |           | 43478609 | 1838124 | 100.000 | 100.000  |

<sup>1</sup>H NMR, <sup>13</sup>C NMR and HPLC of compound **3h**

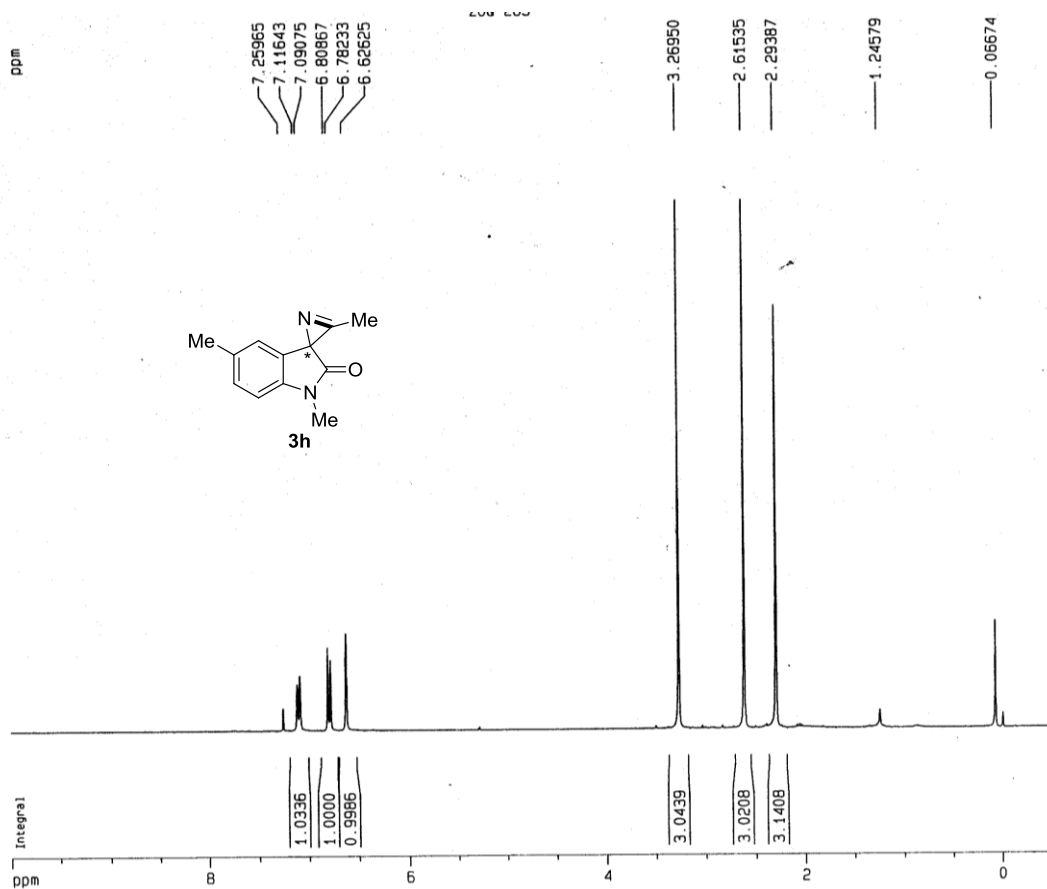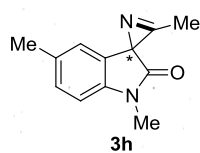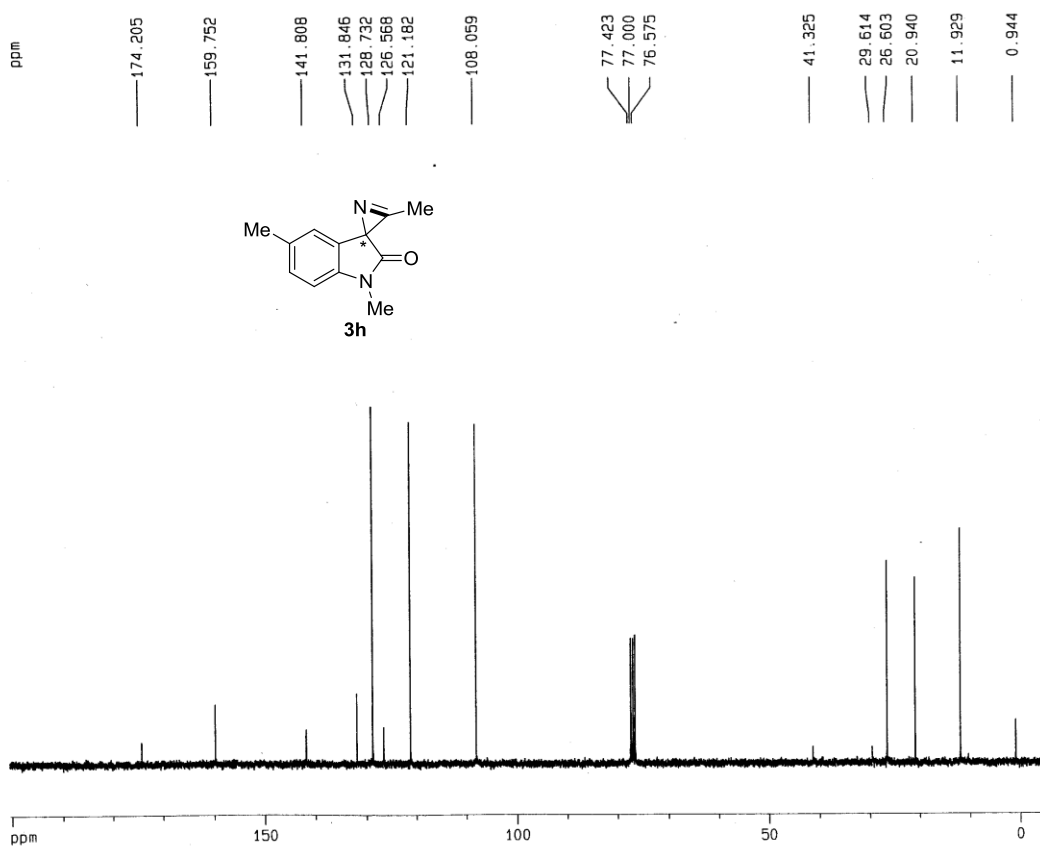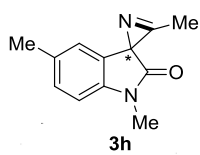



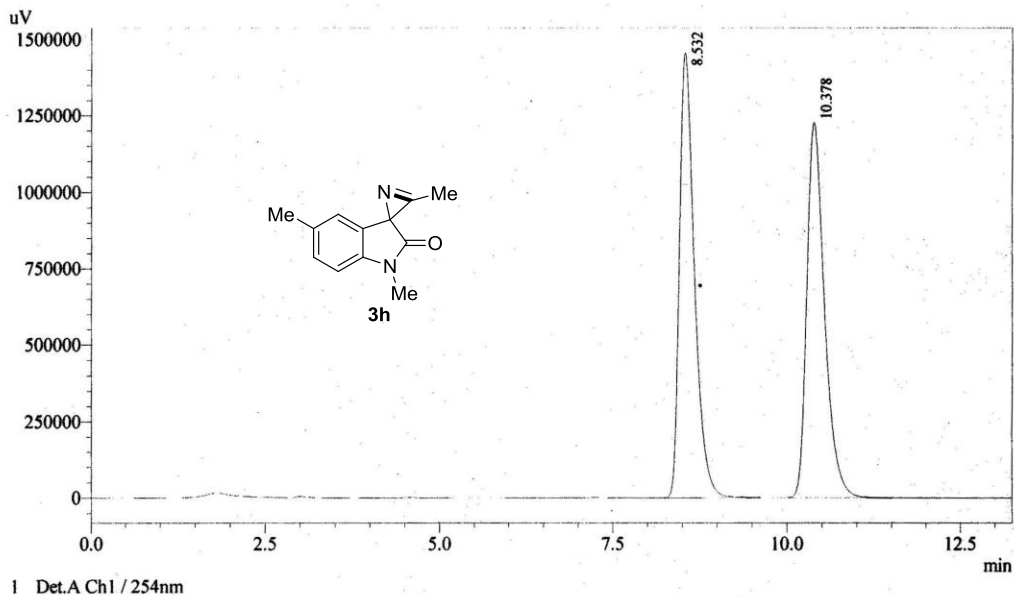

1 Det.A Ch1 / 254nm

Detector A Ch1 254nm

| Peak# | Ret. Time | Area     | Height  | Area %  | Height % |
|-------|-----------|----------|---------|---------|----------|
| 1     | 8.532     | 21754098 | 1455799 | 50.079  | 54.280   |
| 2     | 10.378    | 21685276 | 1226204 | 49.921  | 45.720   |
| Total |           | 43439374 | 2682003 | 100.000 | 100.000  |

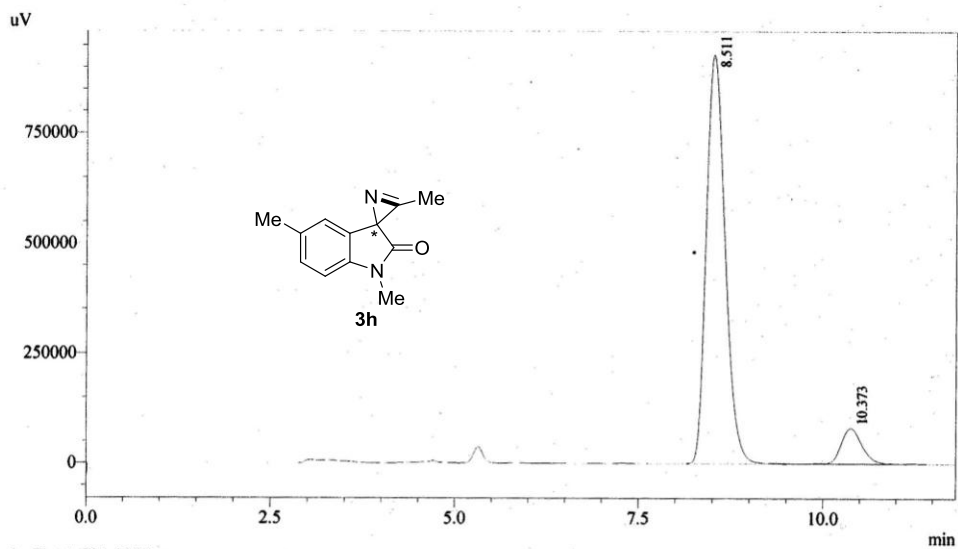

1 Det.A Ch1 / 254nm

Detector A Ch1 254nm

| Peak# | Ret. Time | Area     | Height  | Area %  | Height % |
|-------|-----------|----------|---------|---------|----------|
| 1     | 8.511     | 16489964 | 929252  | 91.281  | 92.004   |
| 2     | 10.373    | 1574996  | 80756   | 8.719   | 7.996    |
| Total |           | 18064959 | 1010008 | 100.000 | 100.000  |

<sup>1</sup>H NMR, <sup>13</sup>C NMR and HPLC of compound **3i**

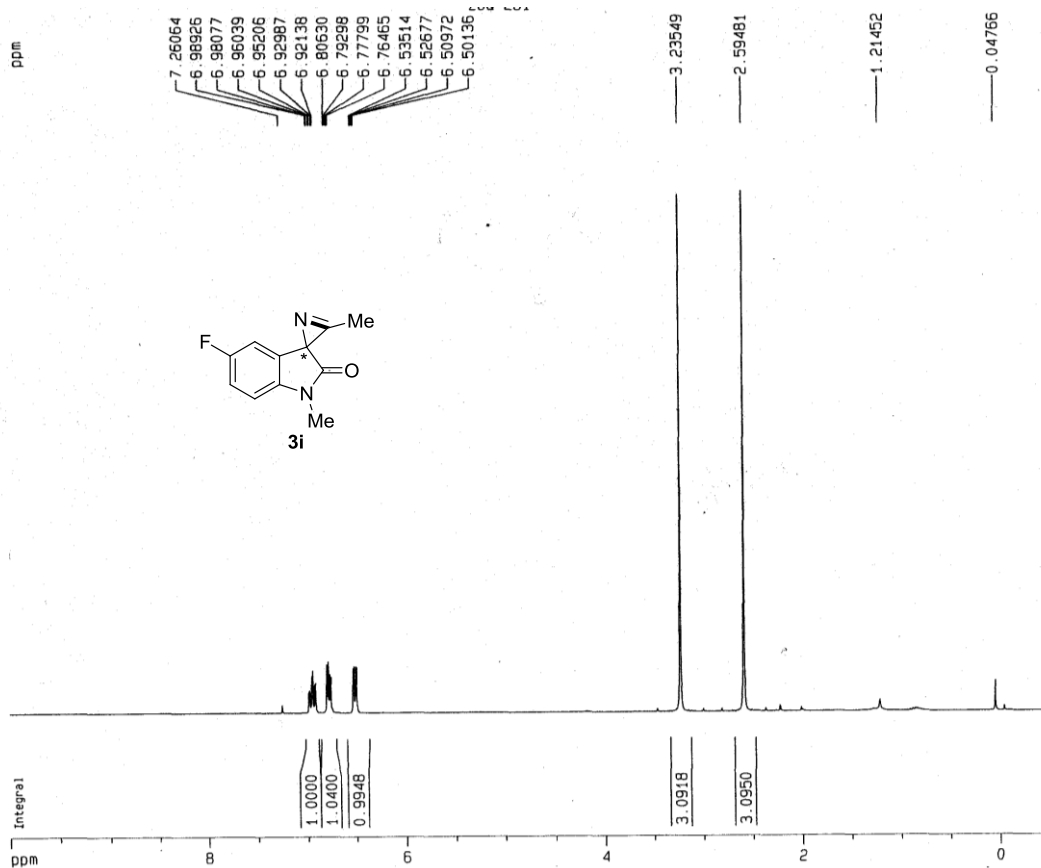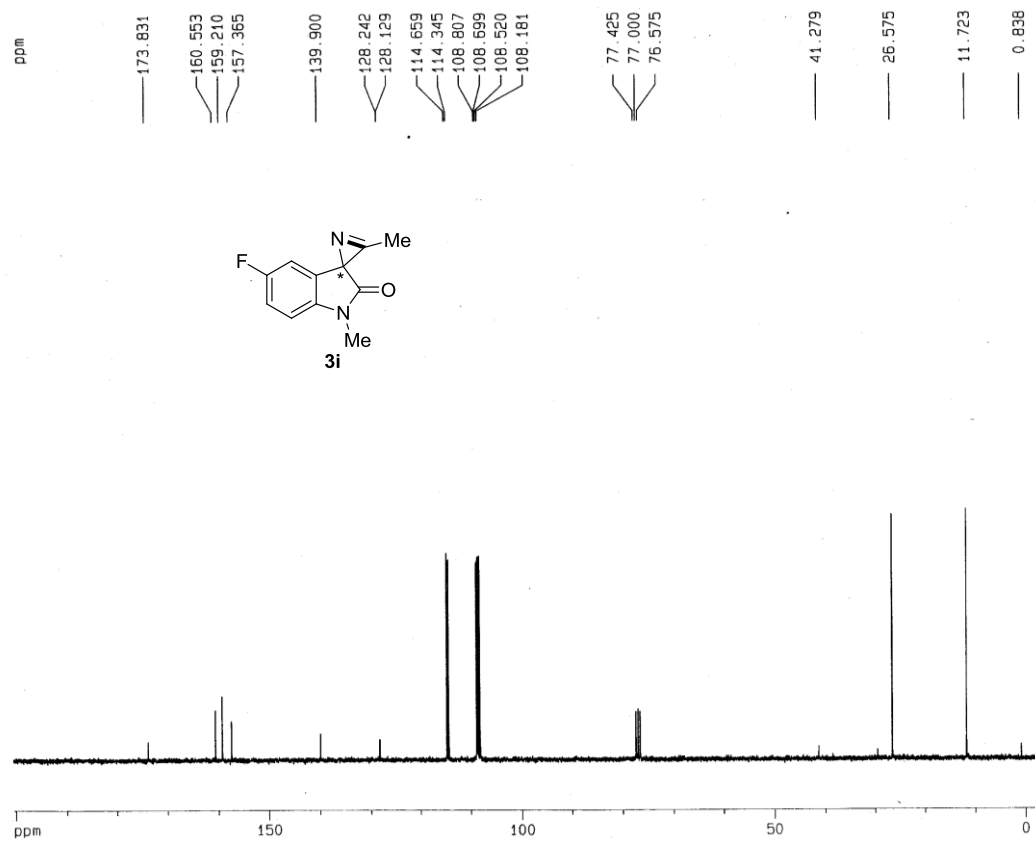

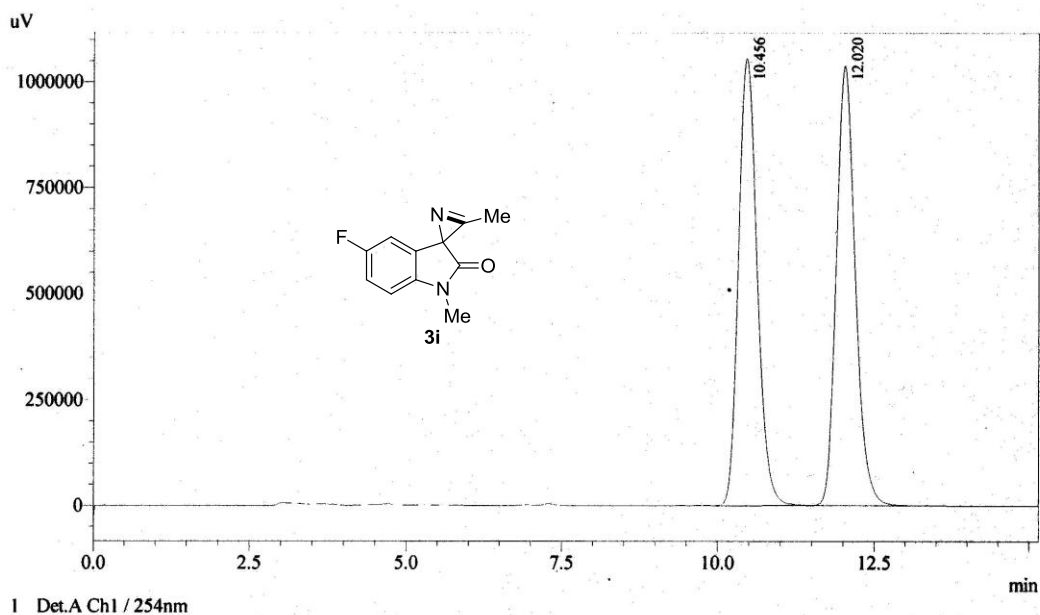

1 Det.A Ch1 / 254nm

Detector A Ch1 254nm

| Peak# | Ret. Time | Area     | Height  | Area %  | Height % |
|-------|-----------|----------|---------|---------|----------|
| 1     | 10.456    | 21957307 | 1055979 | 49.997  | 50.406   |
| 2     | 12.020    | 21960226 | 1038987 | 50.003  | 49.594   |
| Total |           | 43917533 | 2094966 | 100.000 | 100.000  |

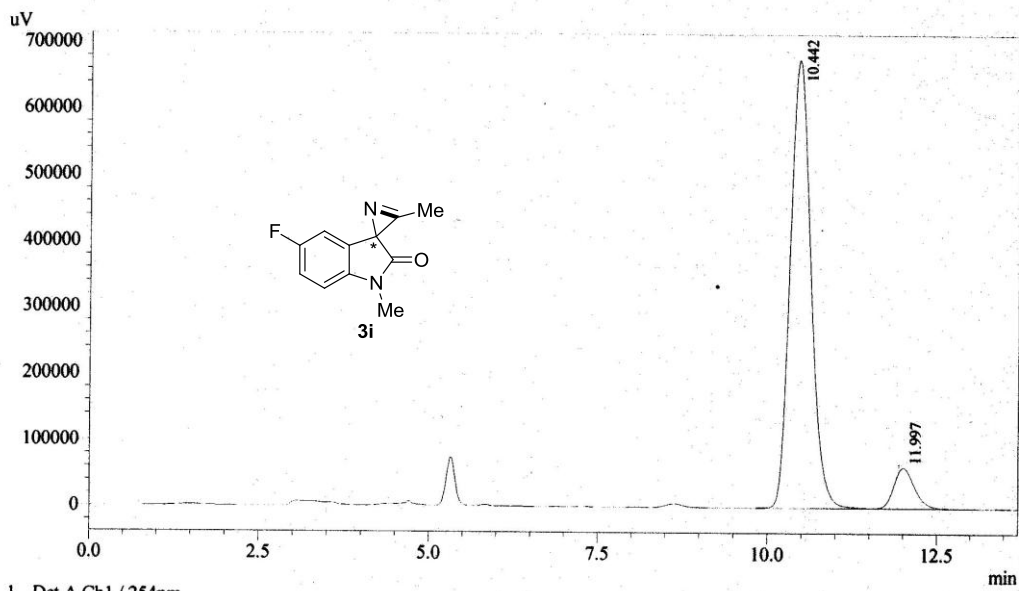

1 Det.A Ch1 / 254nm

Detector A Ch1 254nm

| Peak# | Ret. Time | Area     | Height | Area %  | Height % |
|-------|-----------|----------|--------|---------|----------|
| 1     | 10.442    | 14332427 | 676034 | 91.677  | 91.665   |
| 2     | 11.997    | 1301204  | 61468  | 8.323   | 8.335    |
| Total |           | 15633630 | 737502 | 100.000 | 100.000  |

<sup>1</sup>H NMR, <sup>13</sup>C NMR and HPLC of compound **3j**

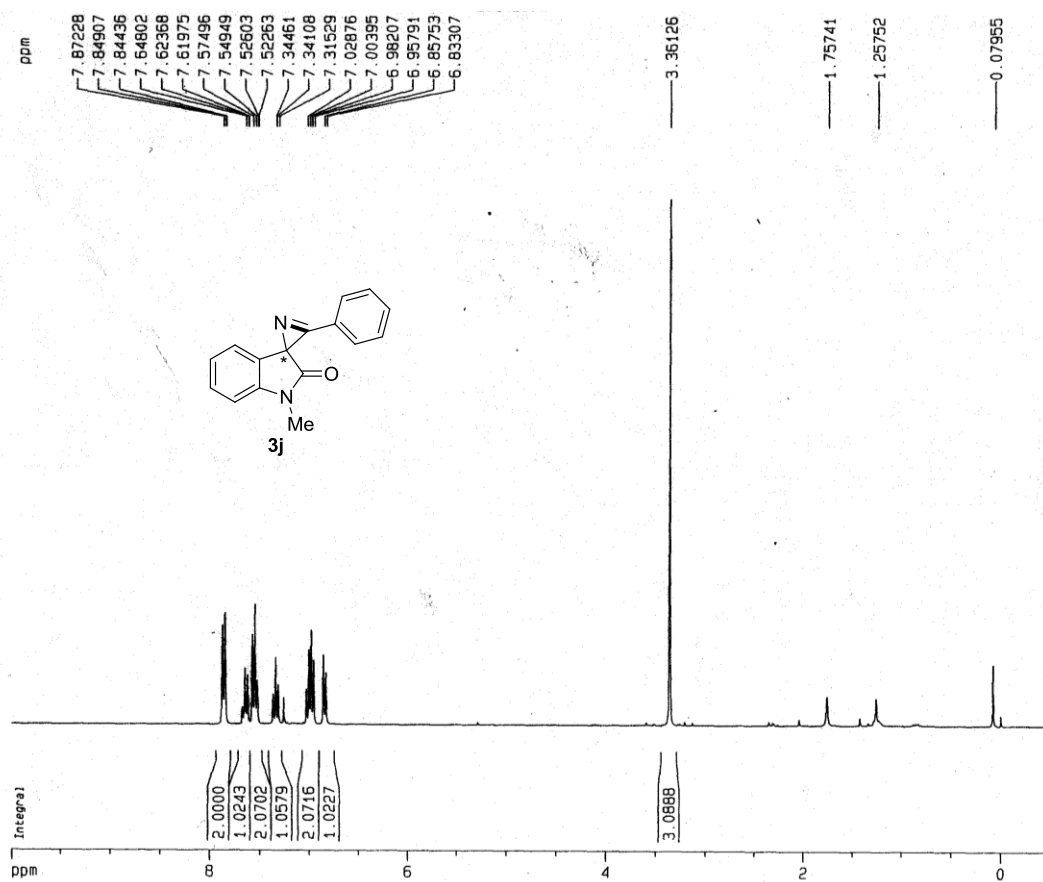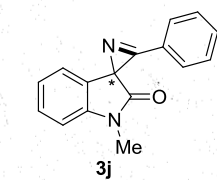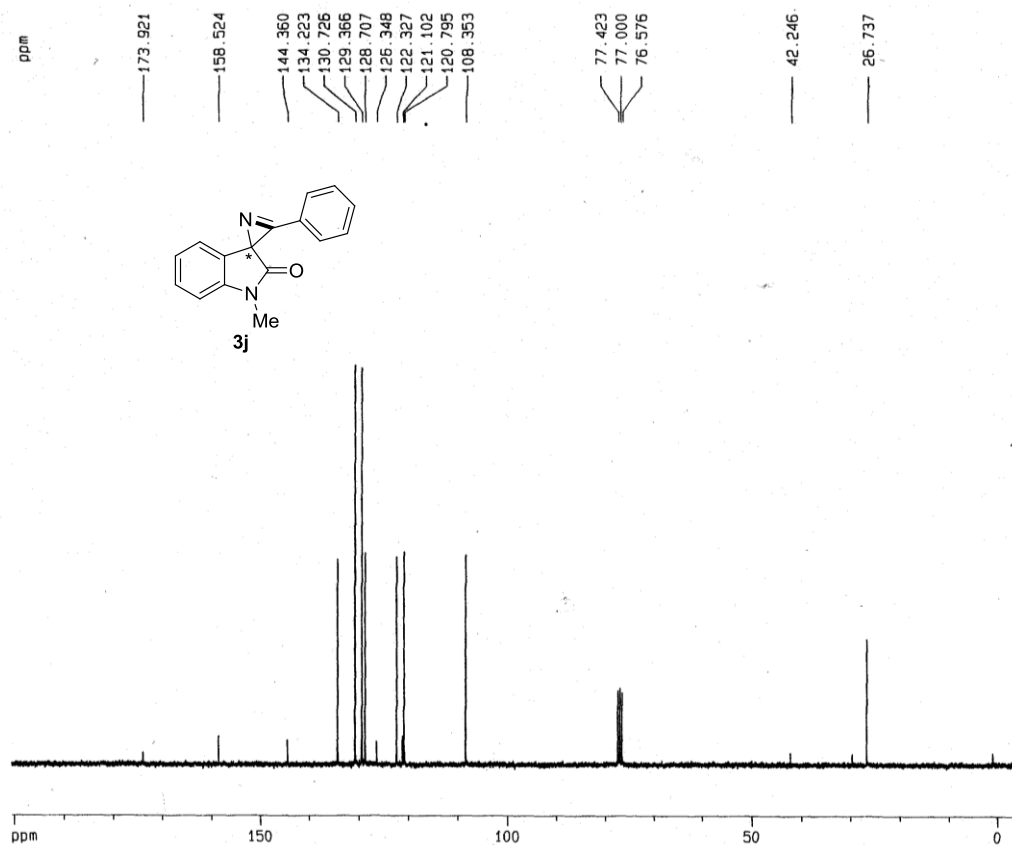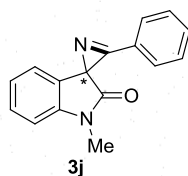

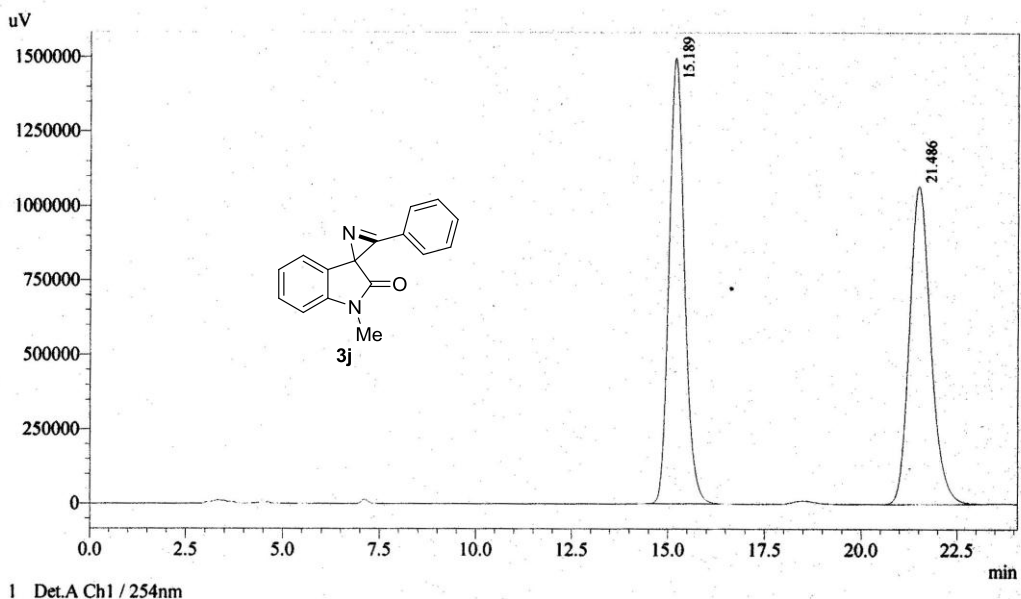

1 Det.A Ch1 / 254nm

Detector A Ch1 254nm

| Peak# | Ret. Time | Area     | Height  | Area %  | Height % |
|-------|-----------|----------|---------|---------|----------|
| 1     | 15.189    | 41633185 | 1498256 | 50.173  | 58.366   |
| 2     | 21.486    | 41346901 | 1068765 | 49.827  | 41.634   |
| Total |           | 82980086 | 2567021 | 100.000 | 100.000  |

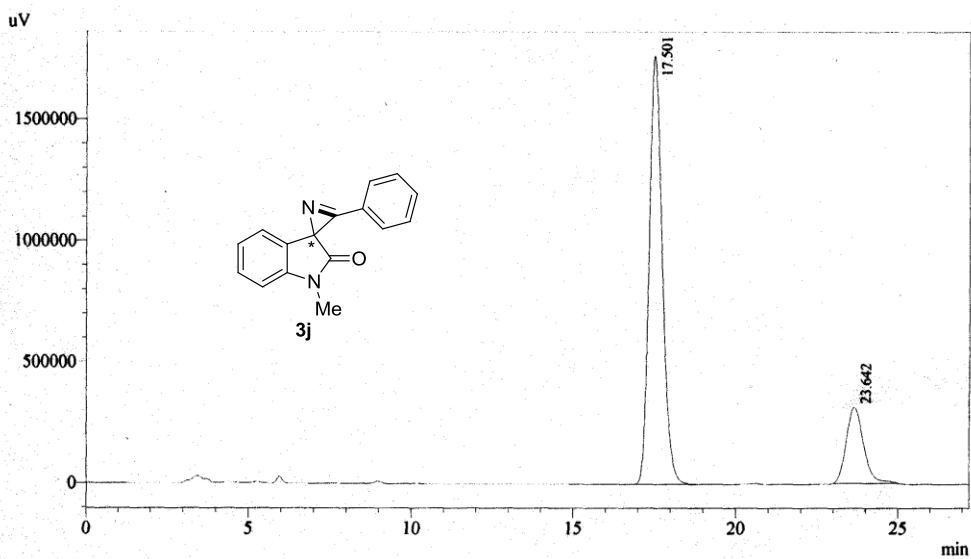

1 Det.A Ch1 / 254nm

Detector A Ch1 254nm

| Peak# | Ret. Time | Area     | Height  | Area %  | Height % |
|-------|-----------|----------|---------|---------|----------|
| 1     | 17.501    | 49558860 | 1766614 | 80.881  | 84.877   |
| 2     | 23.642    | 11714569 | 314763  | 19.119  | 15.123   |
| Total |           | 61273429 | 2081378 | 100.000 | 100.000  |

<sup>1</sup>H NMR, <sup>13</sup>C NMR and HPLC of compound **3k**

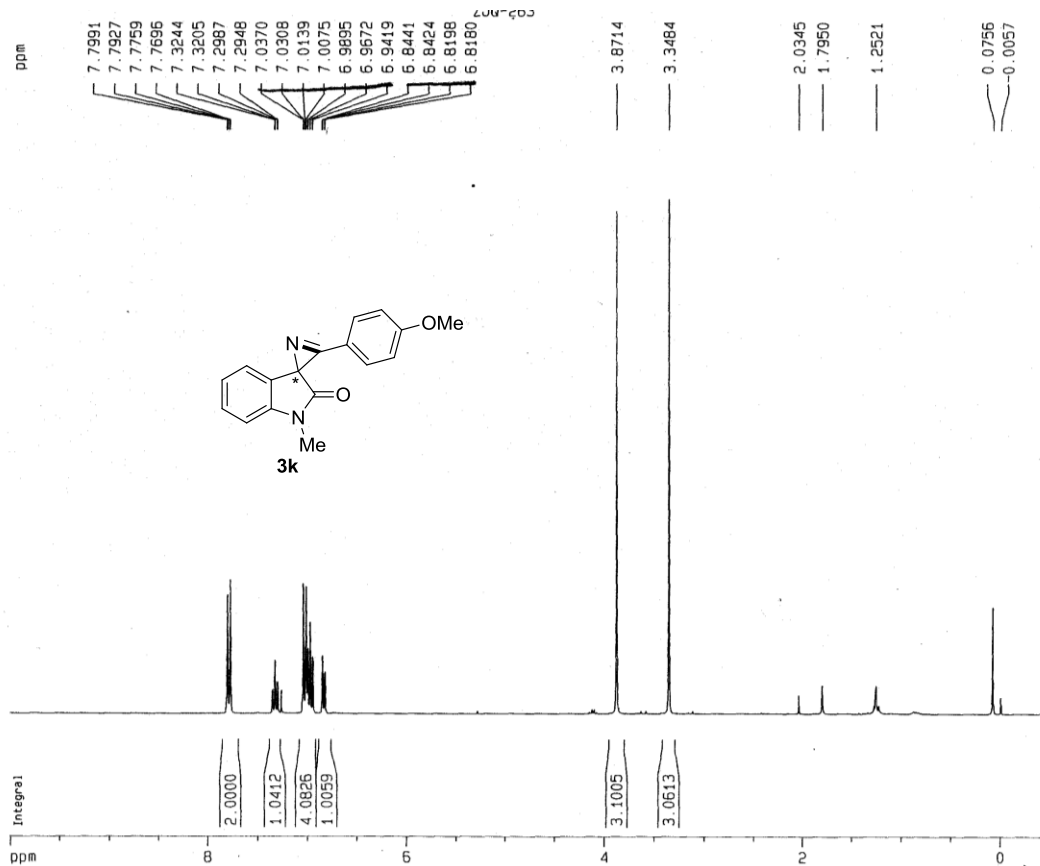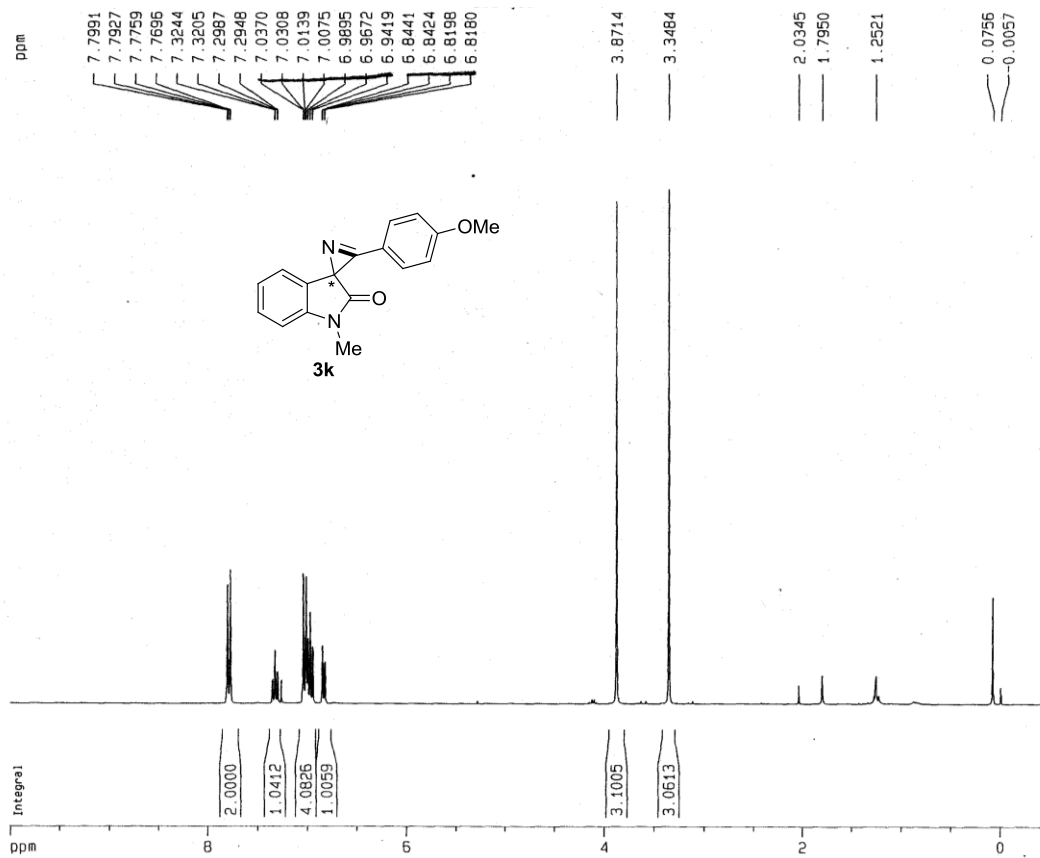

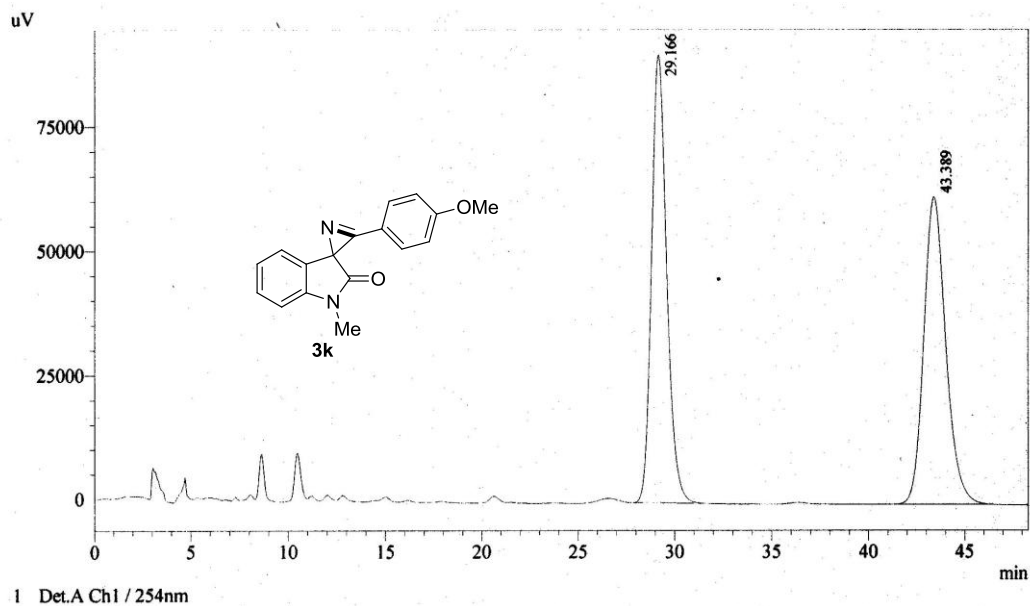

| Peak# | Ret. Time | Area    | Height | Area %  | Height % |
|-------|-----------|---------|--------|---------|----------|
| 1     | 29.166    | 4921603 | 90300  | 49.822  | 59.319   |
| 2     | 43.389    | 4956684 | 61928  | 50.178  | 40.681   |
| Total |           | 9878287 | 152228 | 100.000 | 100.000  |

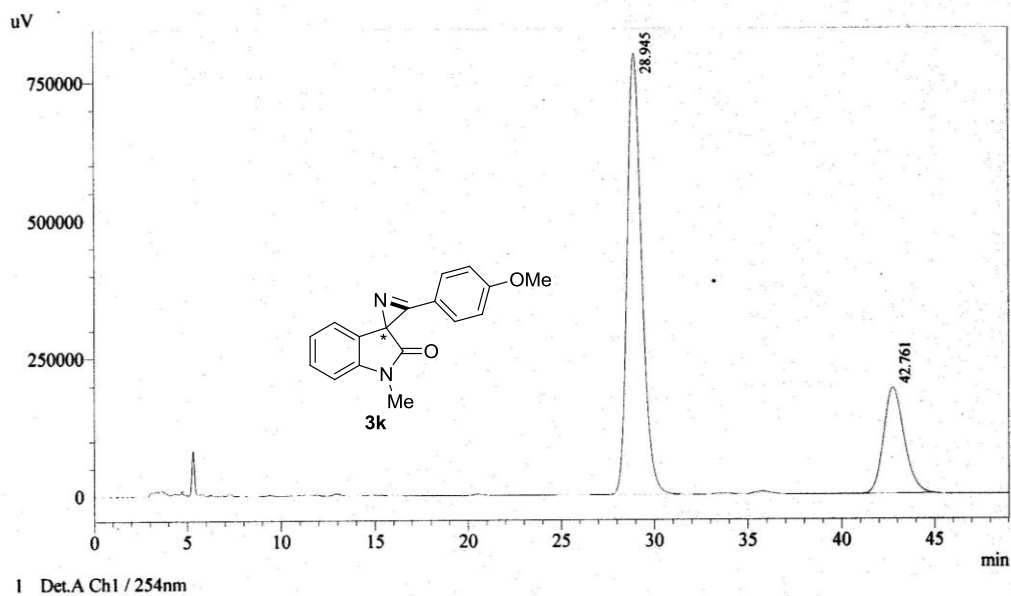

| Peak# | Ret. Time | Area     | Height | Area %  | Height % |
|-------|-----------|----------|--------|---------|----------|
| 1     | 28.945    | 43564958 | 800778 | 74.479  | 80.597   |
| 2     | 42.761    | 14927910 | 192783 | 25.521  | 19.403   |
| Total |           | 58492868 | 993561 | 100.000 | 100.000  |

<sup>1</sup>H NMR, <sup>13</sup>C NMR and HPLC of compound **31**

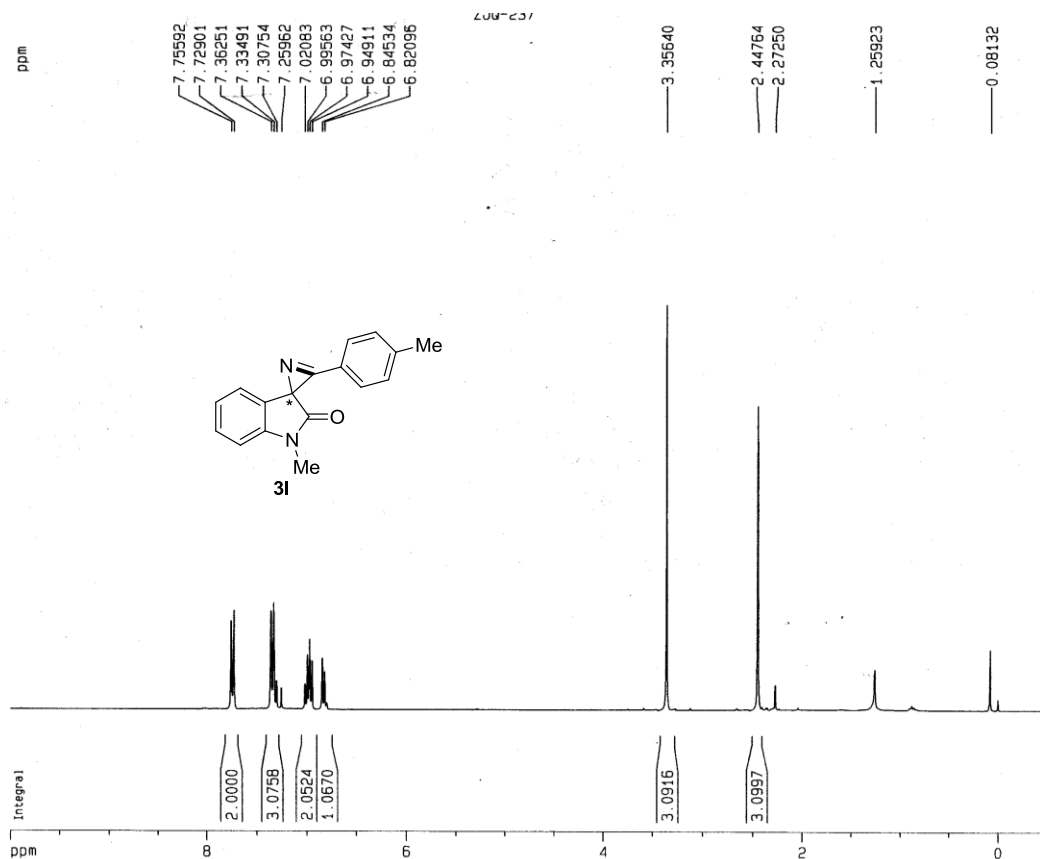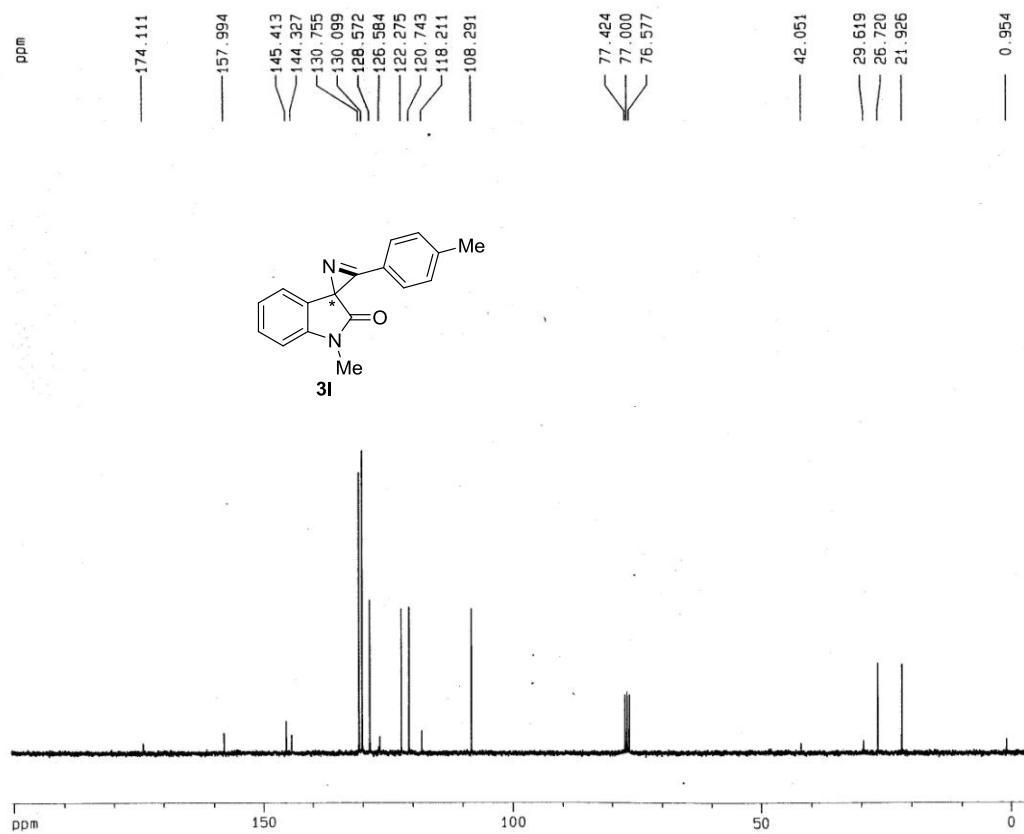



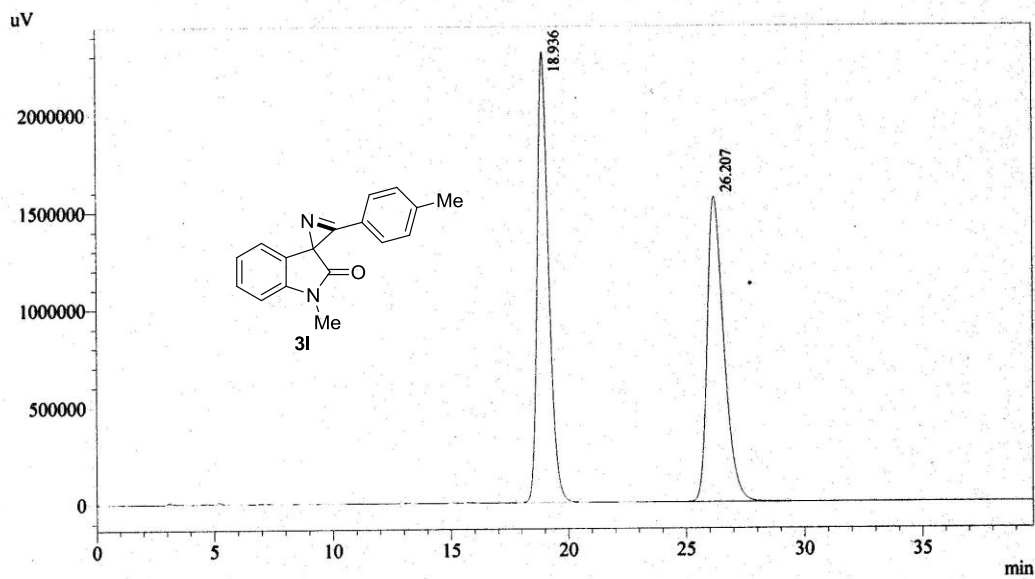

1 Det.A Ch1 / 254nm

Detector A Ch1 254nm

| Peak# | Ret. Time | Area      | Height  | Area %  | Height % |
|-------|-----------|-----------|---------|---------|----------|
| 1     | 18.936    | 77905636  | 2315925 | 50.296  | 59.628   |
| 2     | 26.207    | 76987835  | 1568036 | 49.704  | 40.372   |
| Total |           | 154893471 | 3883961 | 100.000 | 100.000  |

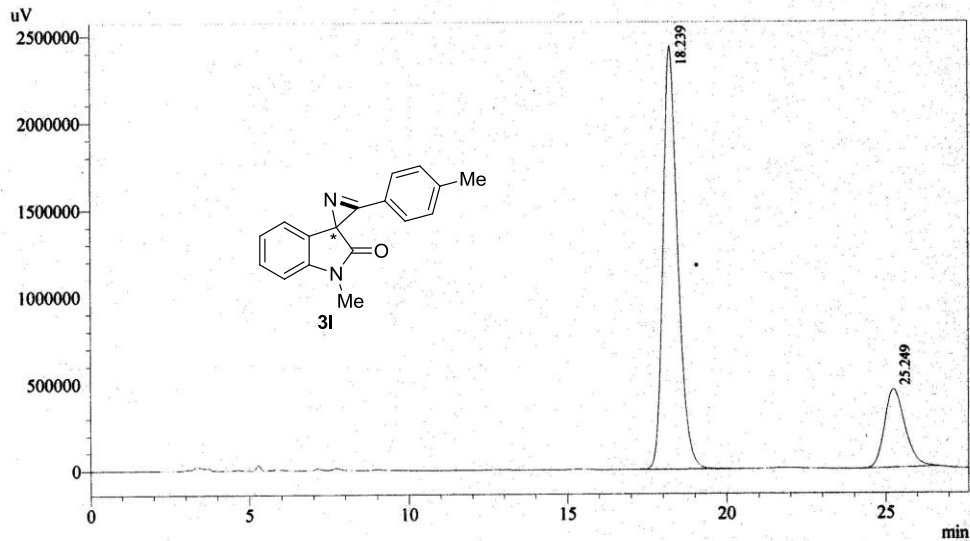

1 Det.A Ch1 / 254nm

Detector A Ch1 254nm

| Peak# | Ret. Time | Area     | Height  | Area %  | Height % |
|-------|-----------|----------|---------|---------|----------|
| 1     | 18.239    | 78359719 | 2437281 | 79.255  | 84.346   |
| 2     | 25.249    | 20510394 | 452350  | 20.745  | 15.654   |
| Total |           | 98870114 | 2889631 | 100.000 | 100.000  |

<sup>1</sup>H NMR, <sup>13</sup>C NMR and HPLC of compound **3m**

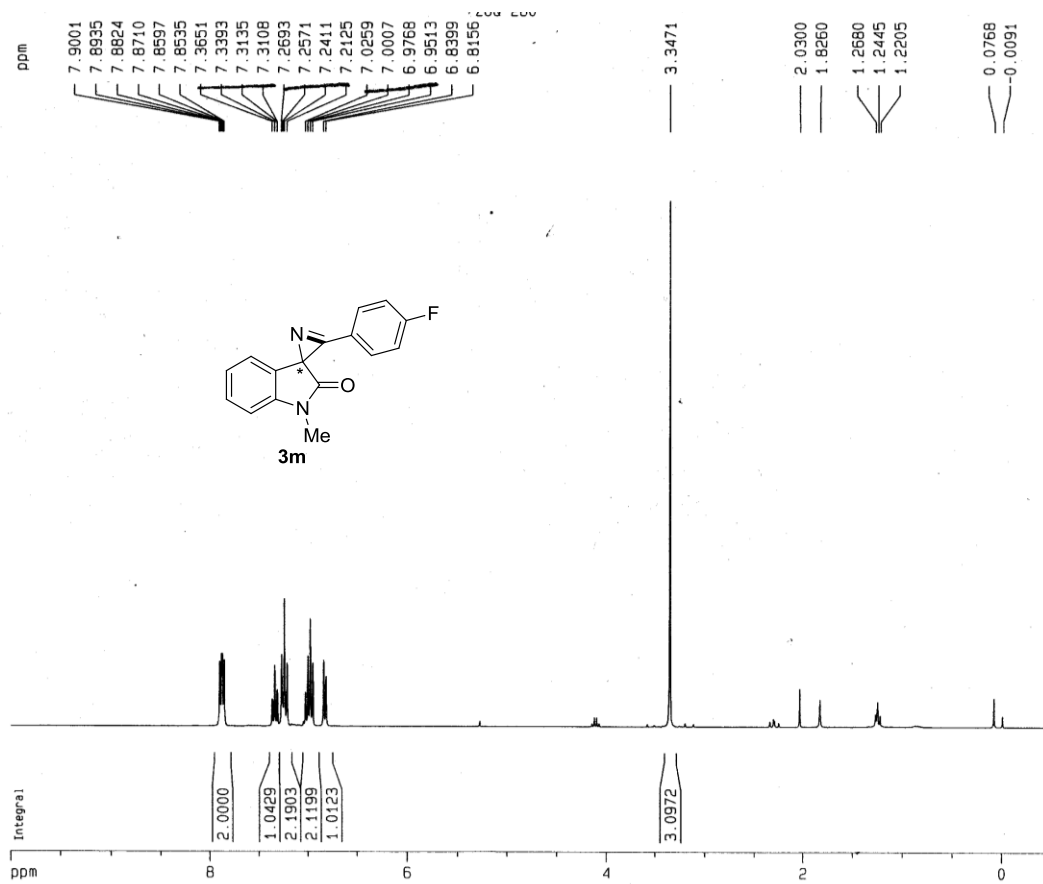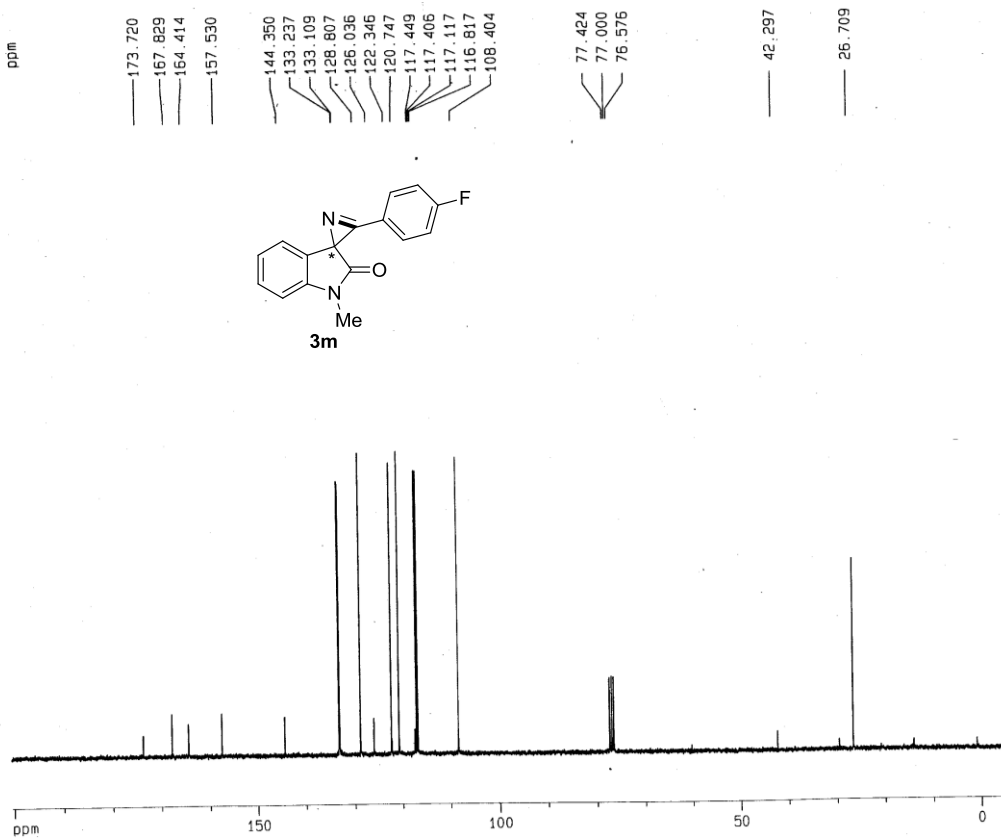

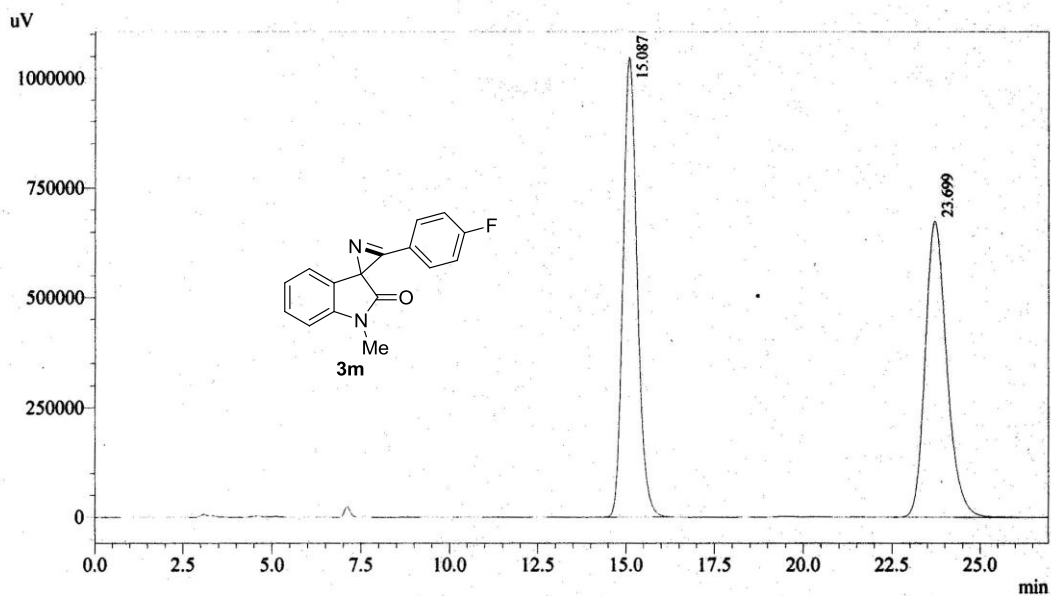

1 Det.A Ch1 / 254nm

Detector A Ch1 254nm

| Peak# | Ret. Time | Area     | Height  | Area %  | Height % |
|-------|-----------|----------|---------|---------|----------|
| 1     | 15.087    | 29136752 | 1047458 | 50.252  | 60.807   |
| 2     | 23.699    | 28844115 | 675150  | 49.748  | 39.193   |
| Total |           | 57980867 | 1722608 | 100.000 | 100.000  |

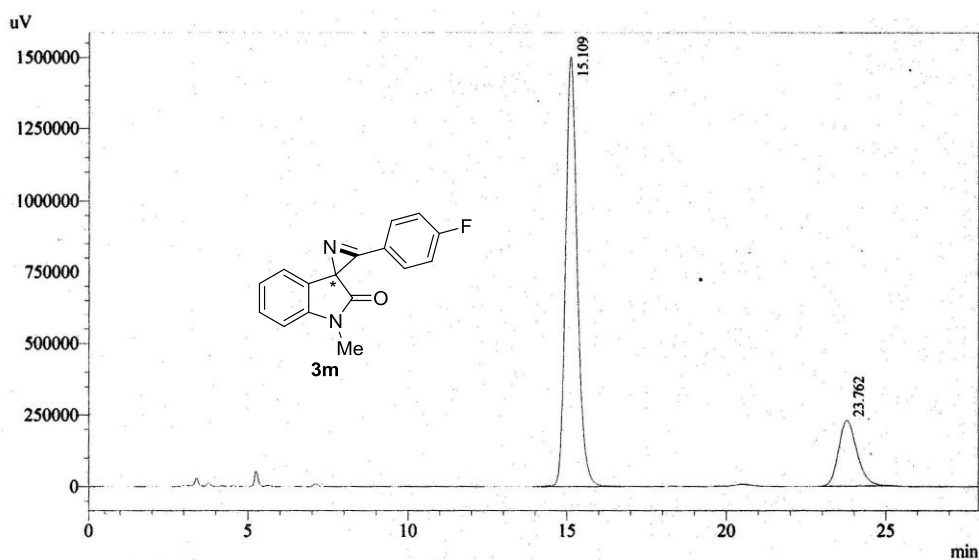

1 Det.A Ch1 / 254nm

Detector A Ch1 254nm

| Peak# | Ret. Time | Area     | Height  | Area %  | Height % |
|-------|-----------|----------|---------|---------|----------|
| 1     | 15.109    | 38342078 | 1503369 | 80.471  | 86.690   |
| 2     | 23.762    | 9304937  | 230817  | 19.529  | 13.310   |
| Total |           | 47647015 | 1734186 | 100.000 | 100.000  |

<sup>1</sup>H NMR, <sup>13</sup>C NMR and HPLC of compound **3n**

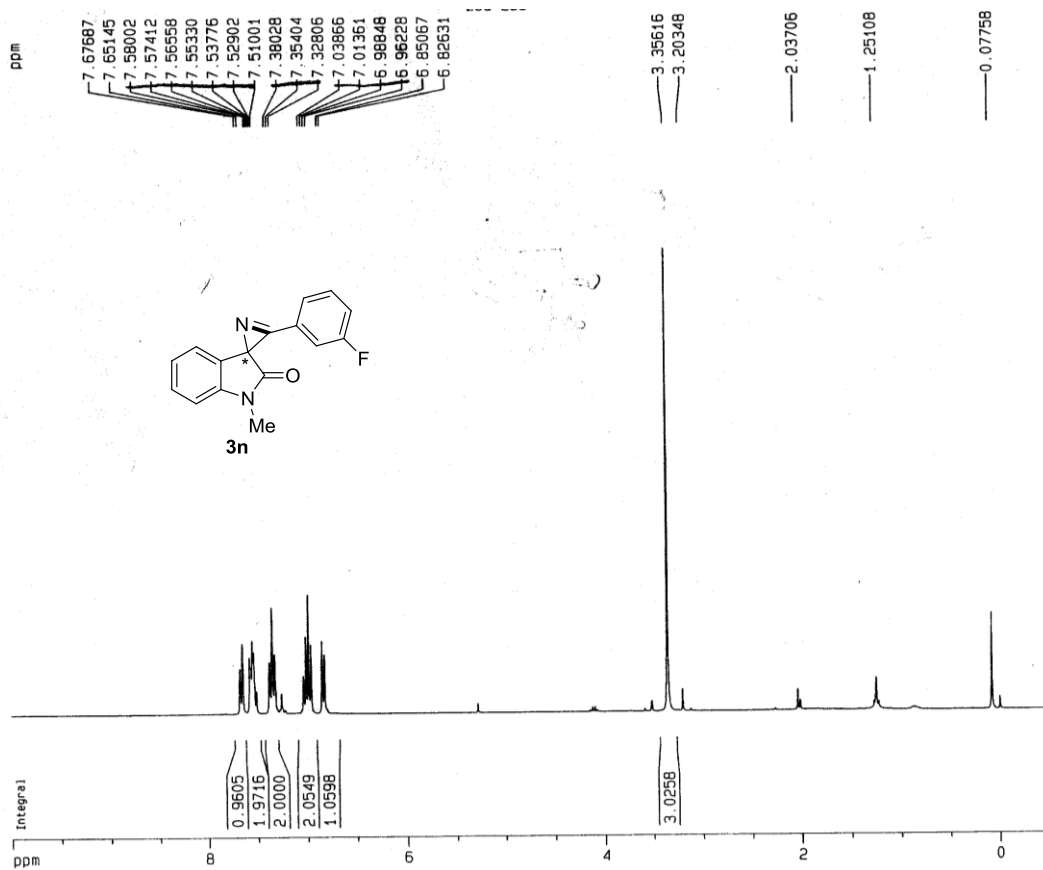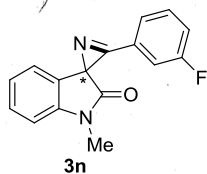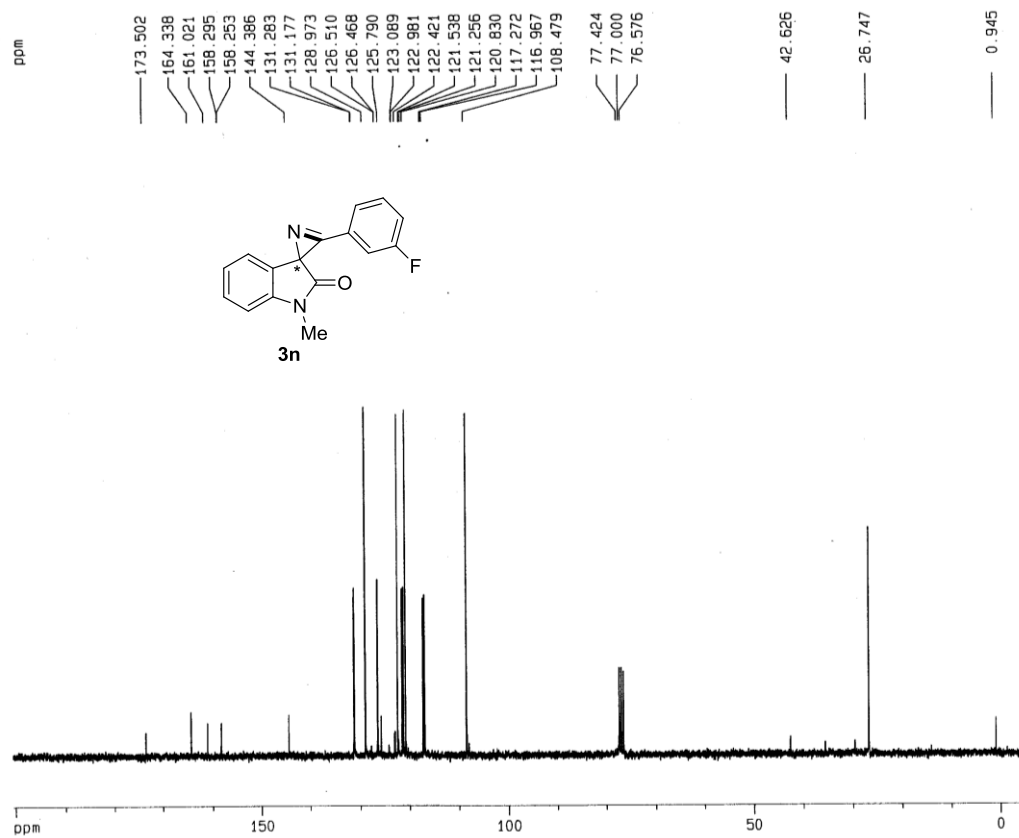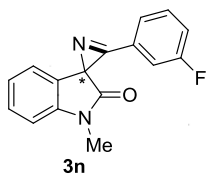

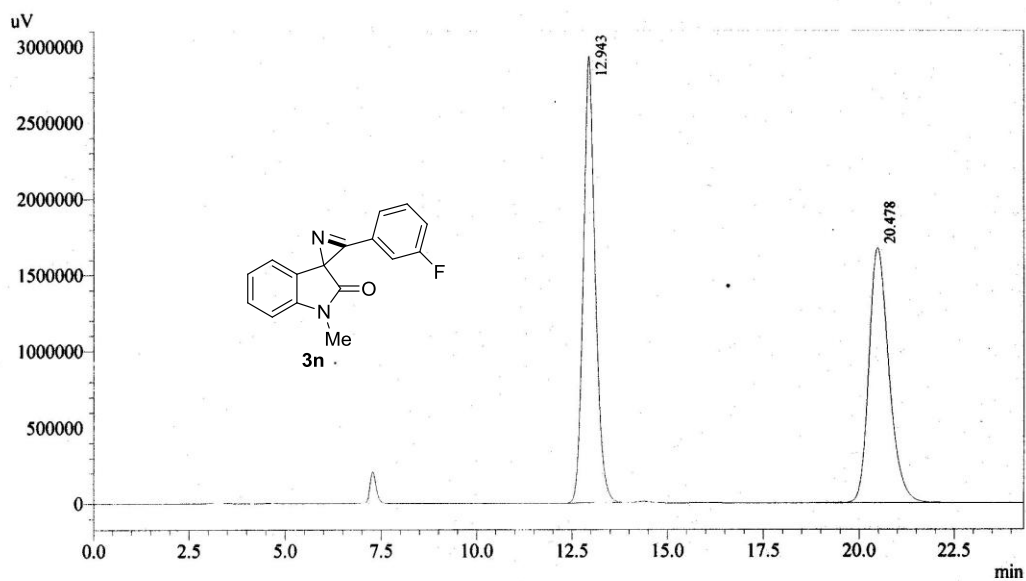

1 Det.A Ch1 / 254nm

Detector A Ch1 254nm

| Peak# | Ret. Time | Area      | Height  | Area %  | Height % |
|-------|-----------|-----------|---------|---------|----------|
| 1     | 12.943    | 63458599  | 2935100 | 50.867  | 63.653   |
| 2     | 20.478    | 61296232  | 1676001 | 49.133  | 36.347   |
| Total |           | 124754831 | 4611101 | 100.000 | 100.000  |

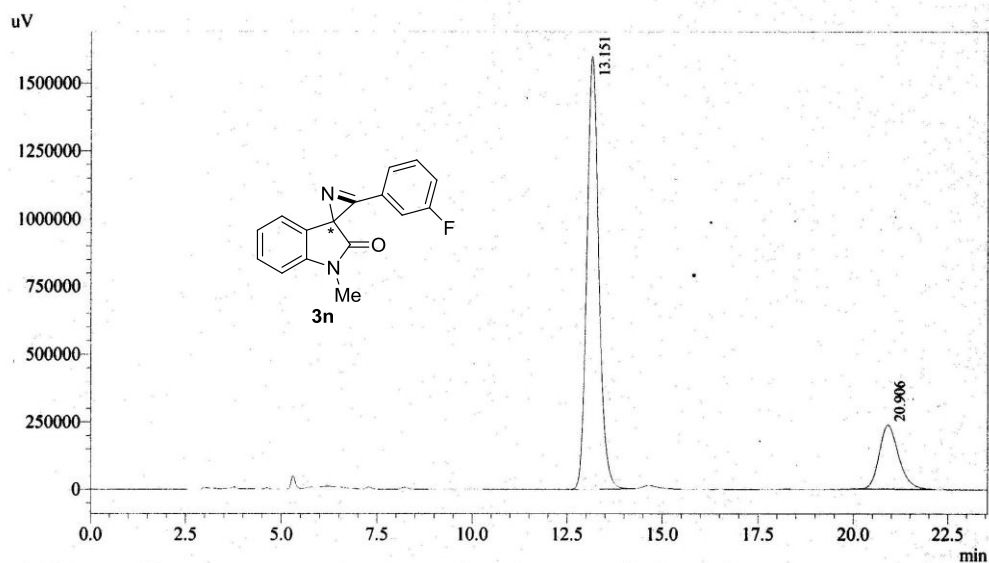

1 Det.A Ch1 / 254nm

Detector A Ch1 254nm

| Peak# | Ret. Time | Area     | Height  | Area %  | Height % |
|-------|-----------|----------|---------|---------|----------|
| 1     | 13.151    | 35012379 | 1601170 | 80.528  | 87.109   |
| 2     | 20.906    | 8466231  | 236955  | 19.472  | 12.891   |
| Total |           | 43478609 | 1838124 | 100.000 | 100.000  |

<sup>1</sup>H NMR, <sup>13</sup>C NMR and HPLC of compound **3o**

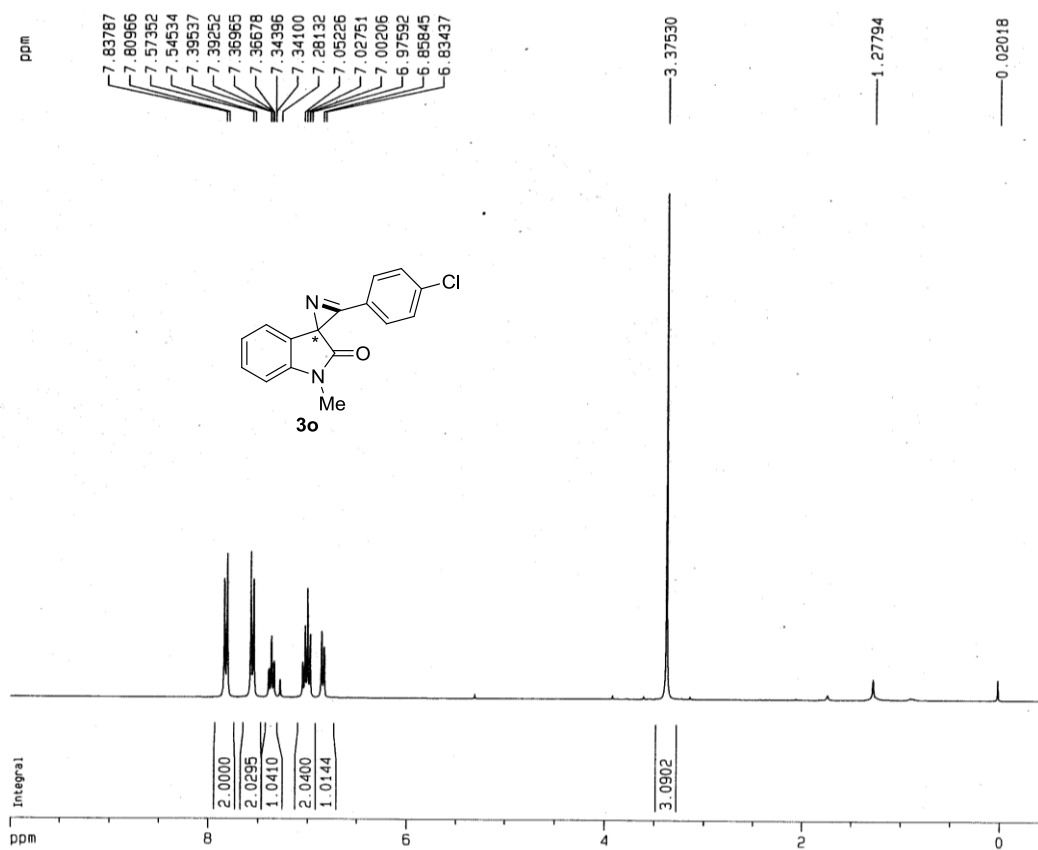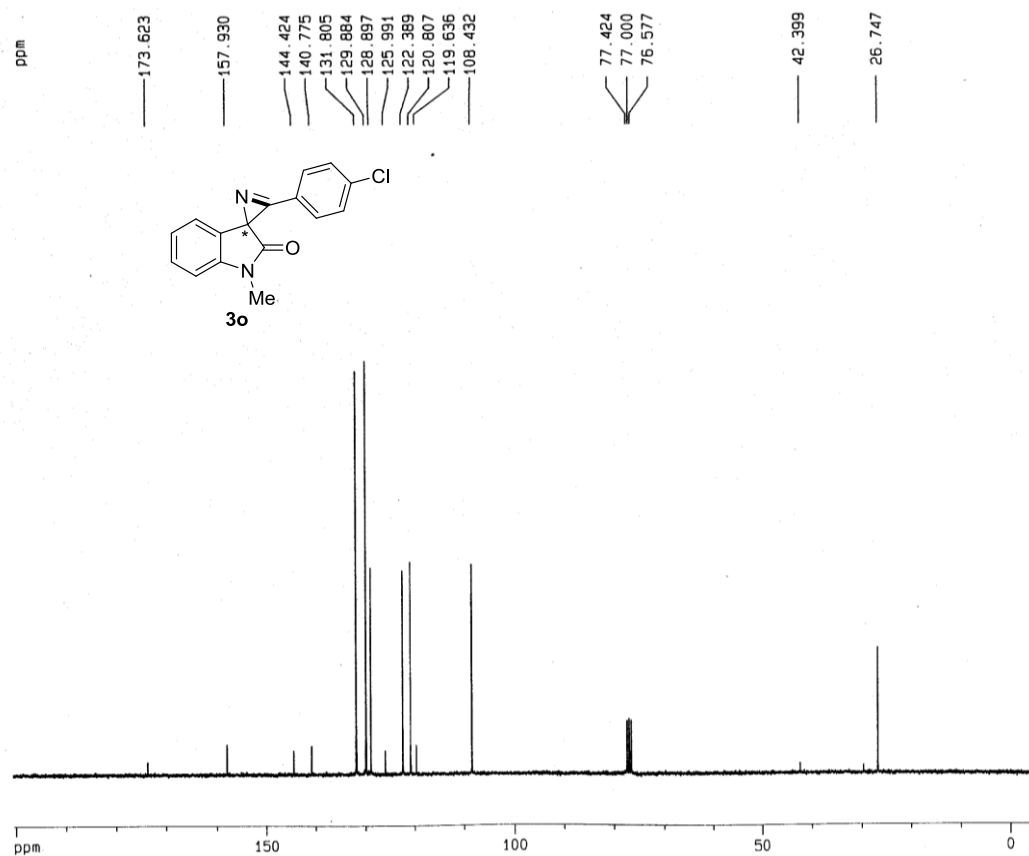

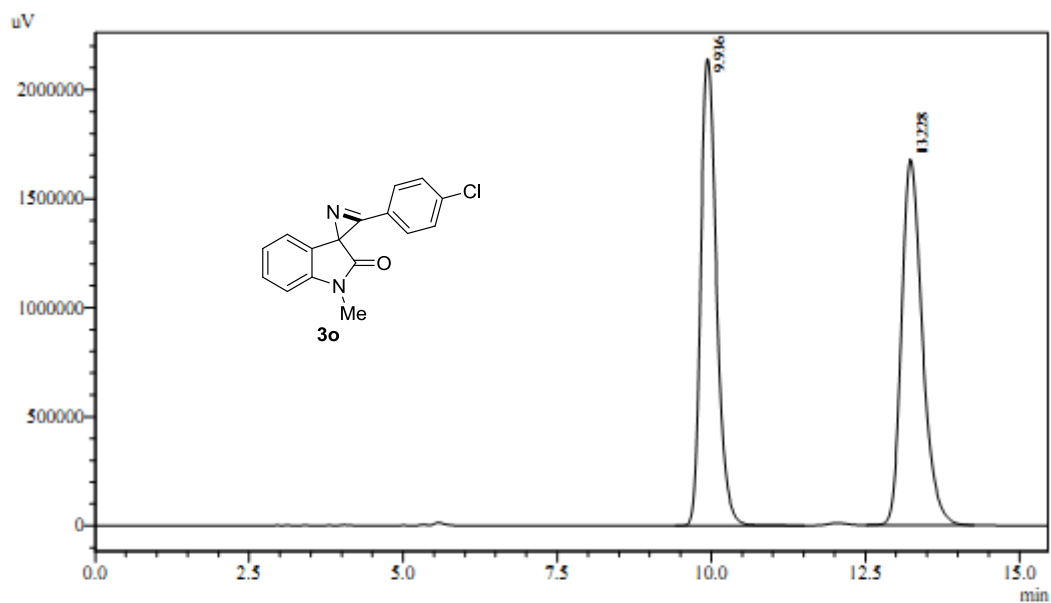

1 Det.A Ch1 / 254nm

Detector A Ch1 254nm

| Peak# | Ret. Time | Area     | Height  | Area %  | Height % |
|-------|-----------|----------|---------|---------|----------|
| 1     | 9.936     | 38203596 | 2141791 | 49.223  | 56.050   |
| 2     | 13.228    | 39410192 | 1679437 | 50.777  | 43.950   |
| Total |           | 77613789 | 3821228 | 100.000 | 100.000  |

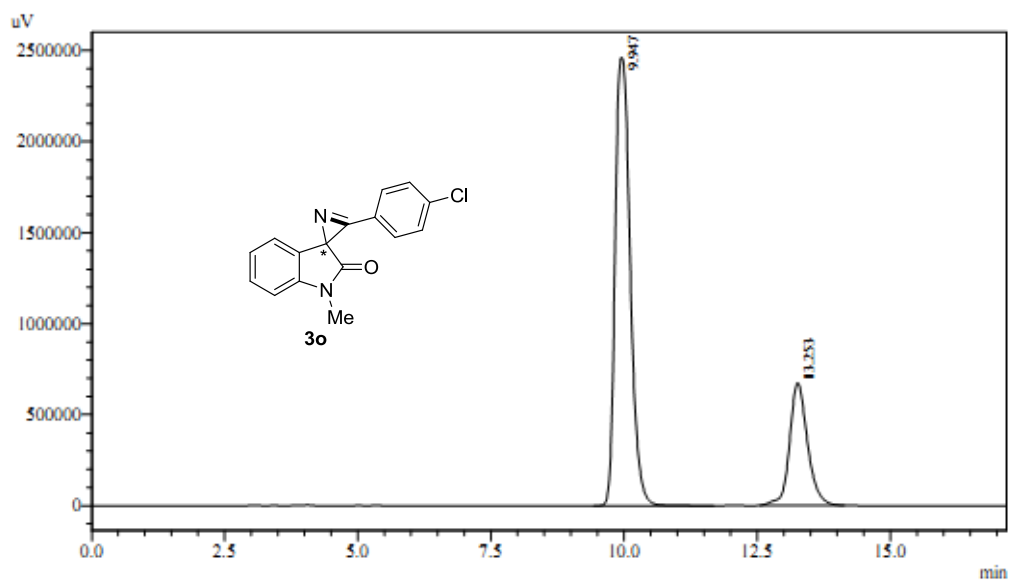

1 Det.A Ch1 / 254nm

Detector A Ch1 254nm

| Peak# | Ret. Time | Area     | Height  | Area %  | Height % |
|-------|-----------|----------|---------|---------|----------|
| 1     | 9.947     | 48508450 | 2462736 | 75.418  | 78.574   |
| 2     | 13.253    | 15811055 | 671554  | 24.582  | 21.426   |
| Total |           | 64319506 | 3134290 | 100.000 | 100.000  |

# <sup>1</sup>H NMR, <sup>13</sup>C NMR and HPLC of compound **3p**

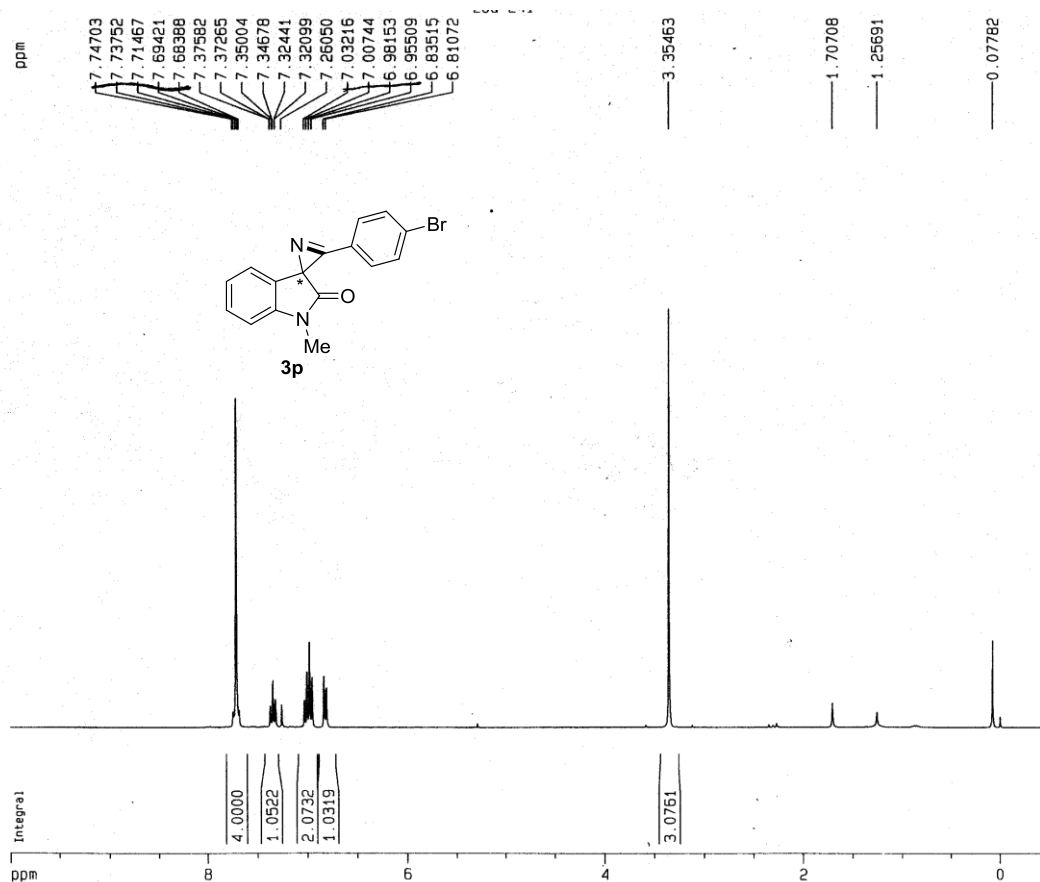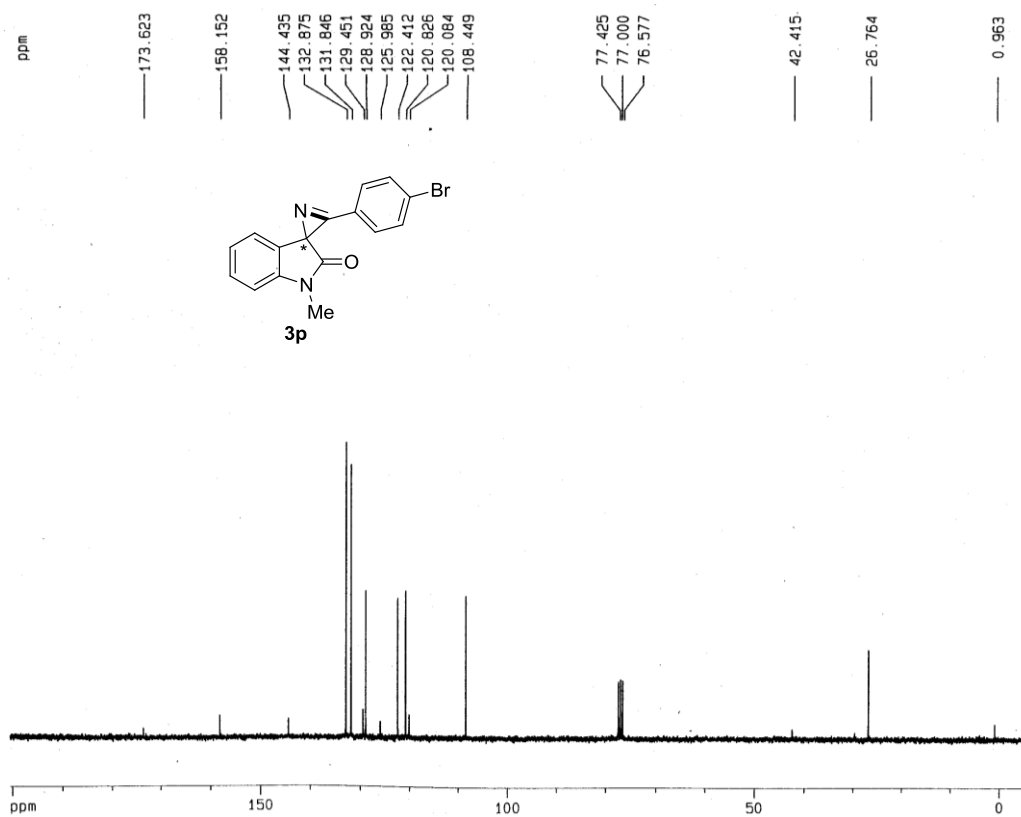



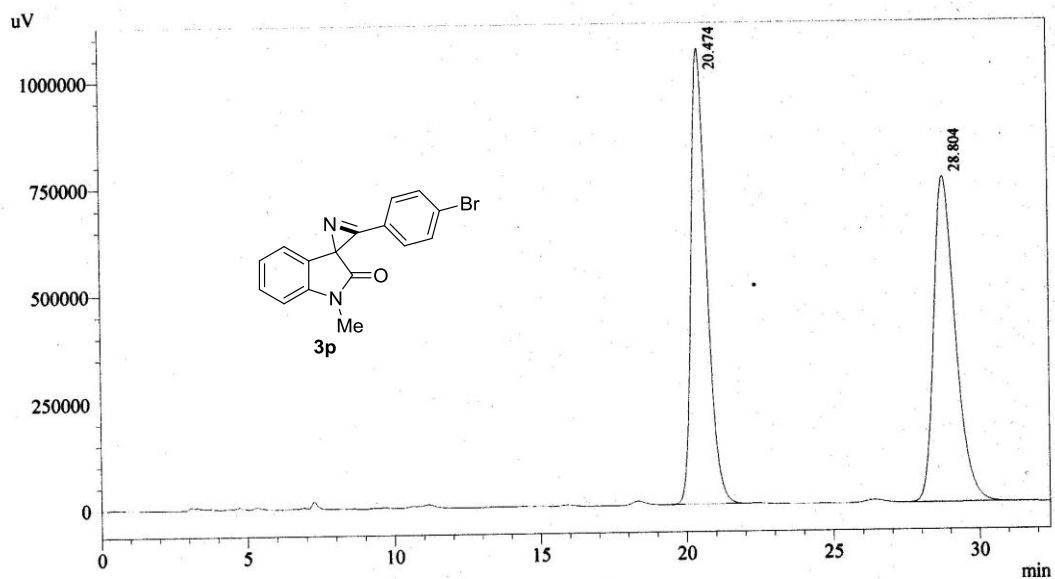

1 Det.A Ch1 / 254nm

Detector A Ch1 254nm

| Peak# | Ret. Time | Area     | Height  | Area %  | Height % |
|-------|-----------|----------|---------|---------|----------|
| 1     | 20.474    | 39266090 | 1066887 | 49.904  | 58.357   |
| 2     | 28.804    | 39417586 | 761332  | 50.096  | 41.643   |
| Total |           | 78683676 | 1828218 | 100.000 | 100.000  |

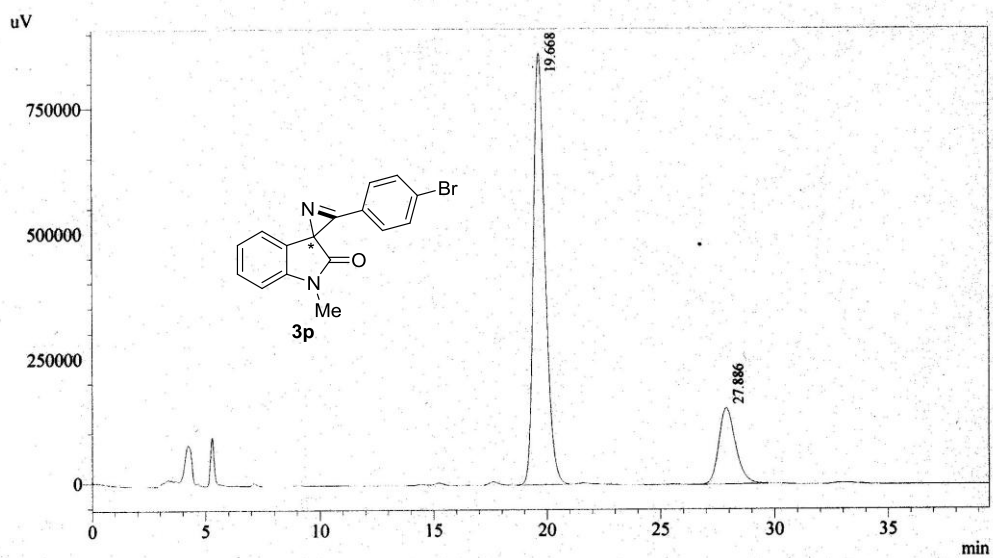

1 Det.A Ch1 / 254nm

Detector A Ch1 254nm

| Peak# | Ret. Time | Area     | Height  | Area %  | Height % |
|-------|-----------|----------|---------|---------|----------|
| 1     | 19.668    | 31104472 | 865742  | 80.043  | 85.026   |
| 2     | 27.886    | 7755473  | 152462  | 19.957  | 14.974   |
| Total |           | 38859946 | 1018204 | 100.000 | 100.000  |

<sup>1</sup>H NMR, <sup>13</sup>C NMR and HPLC of compound **3q**

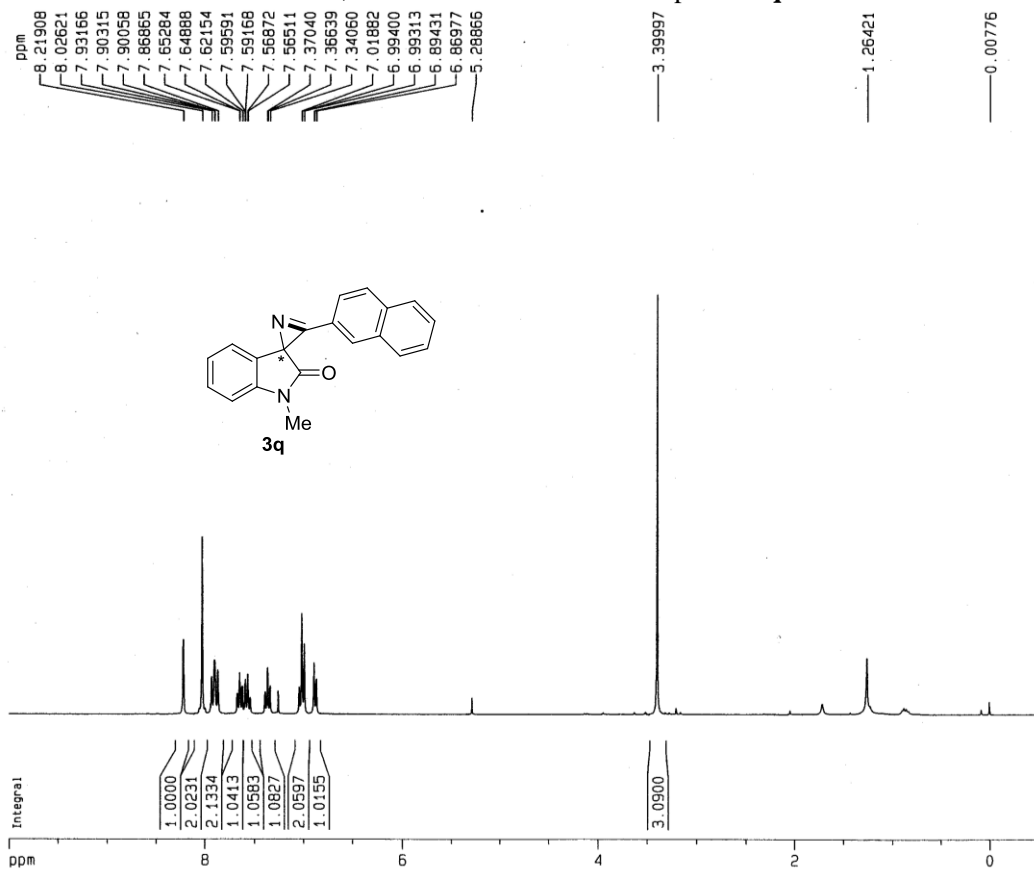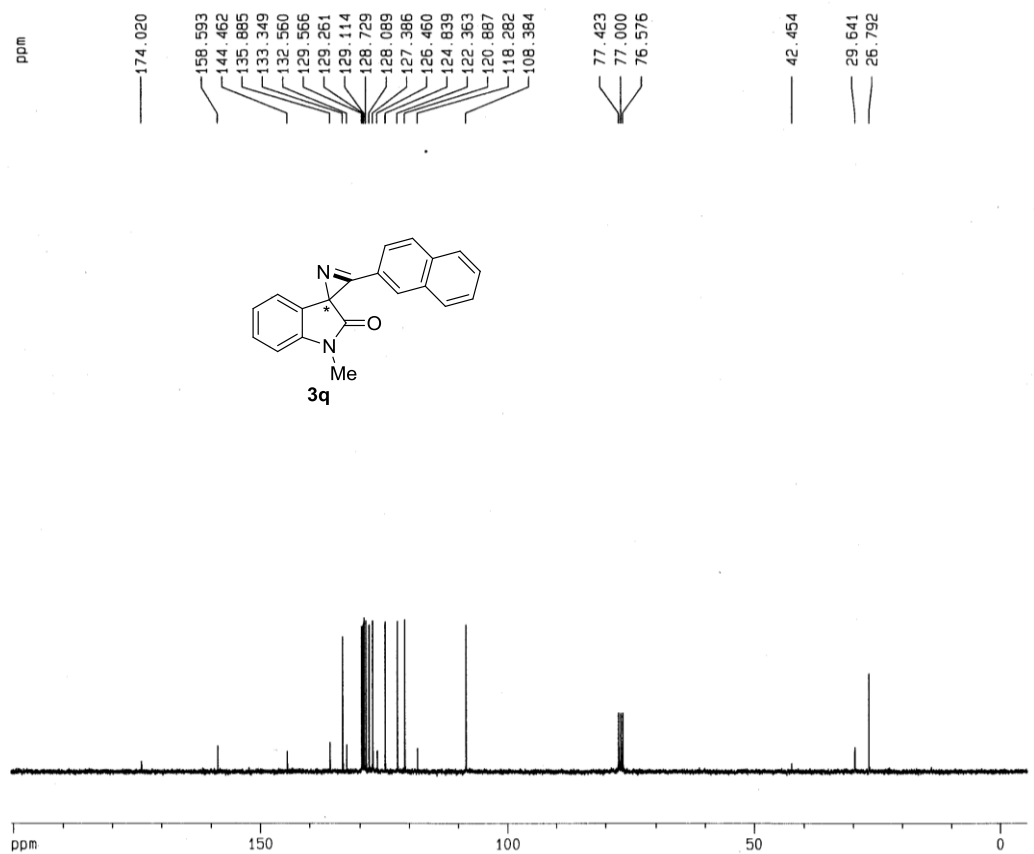

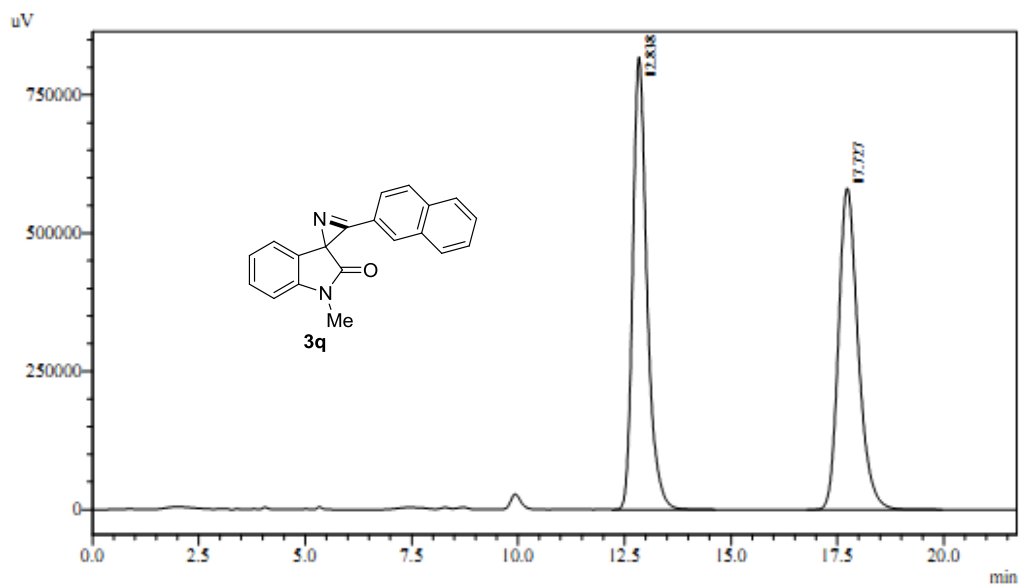

1 Det.A Ch1 / 254nm

Detector A Ch1 254nm

| Peak# | Ret. Time | Area     | Height  | Area %  | Height % |
|-------|-----------|----------|---------|---------|----------|
| 1     | 12.838    | 19019488 | 818666  | 50.485  | 58.457   |
| 2     | 17.727    | 18654360 | 581801  | 49.515  | 41.543   |
| Total |           | 37673848 | 1400467 | 100.000 | 100.000  |

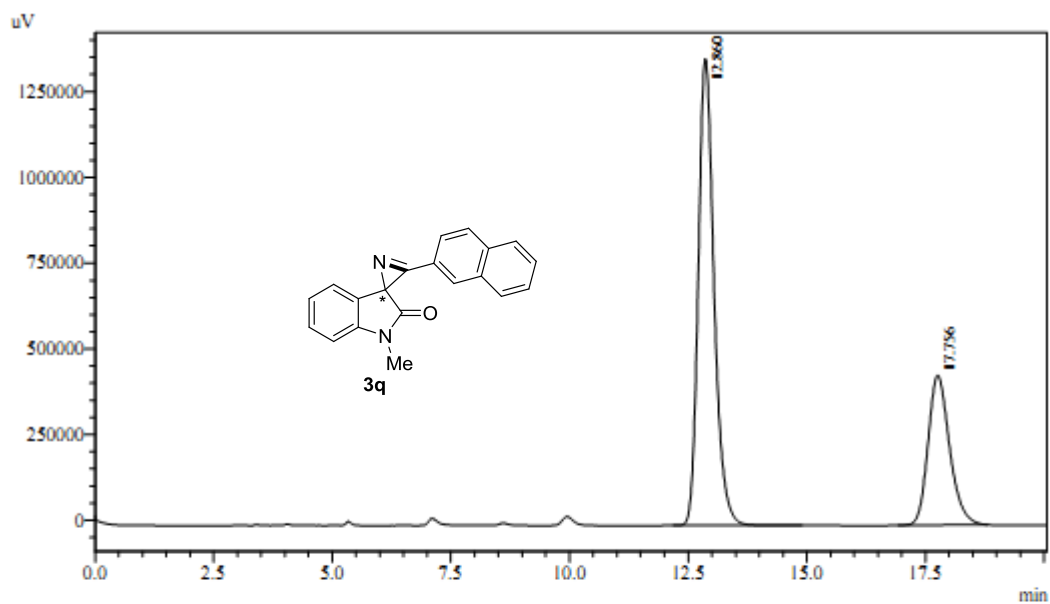

1 Det.A Ch1 / 254nm

Detector A Ch1 254nm

| Peak# | Ret. Time | Area     | Height  | Area %  | Height % |
|-------|-----------|----------|---------|---------|----------|
| 1     | 12.860    | 31459564 | 1360998 | 69.479  | 75.709   |
| 2     | 17.756    | 13819616 | 436665  | 30.521  | 24.291   |
| Total |           | 45279180 | 1797663 | 100.000 | 100.000  |

<sup>1</sup>H NMR, <sup>13</sup>C NMR and HPLC of compound **3r**

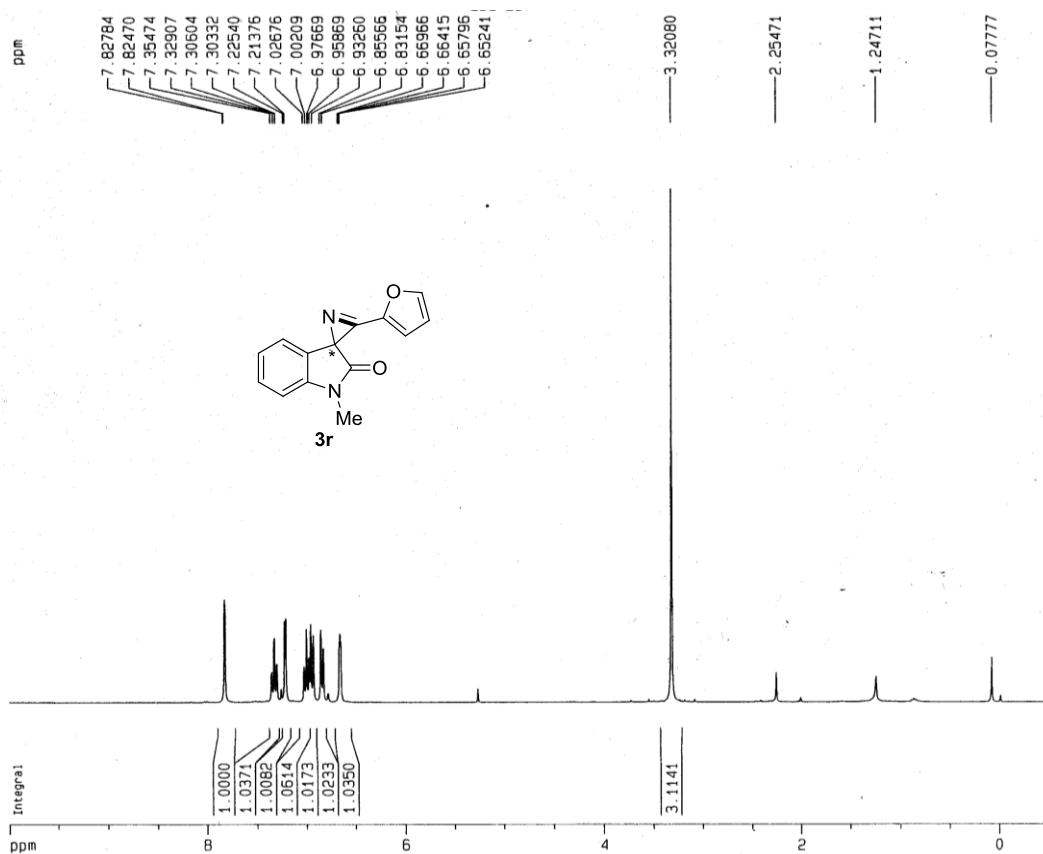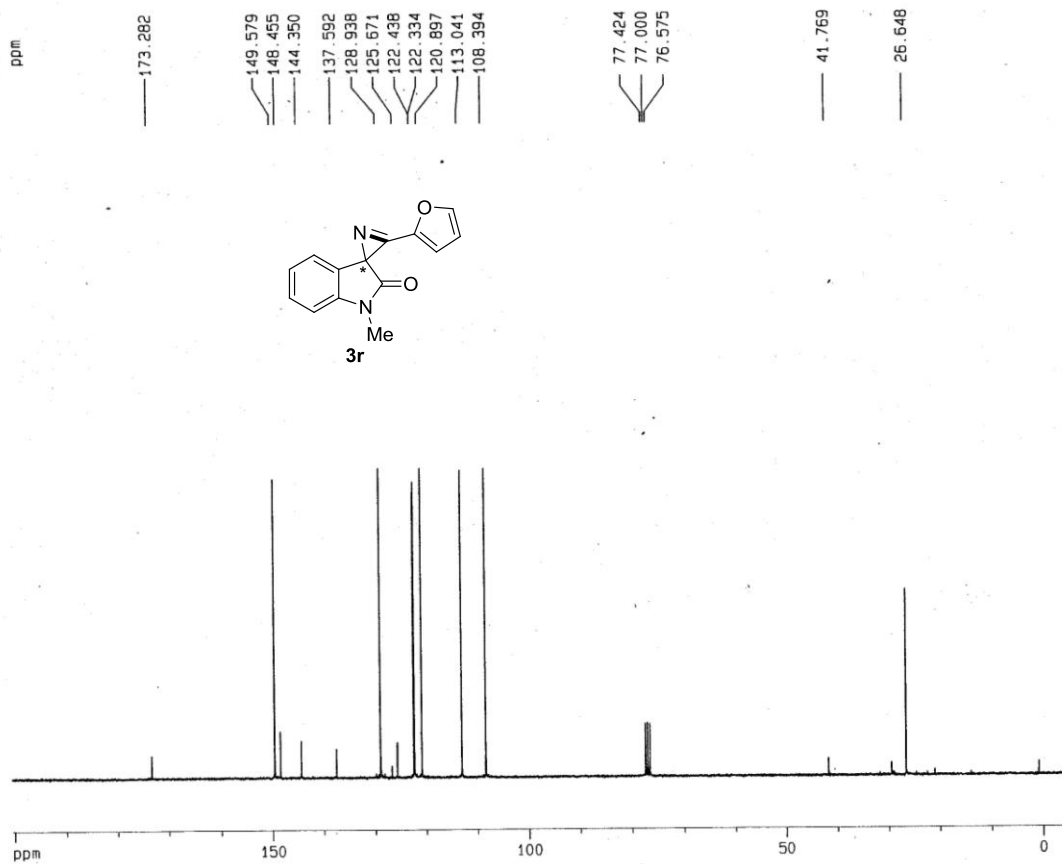

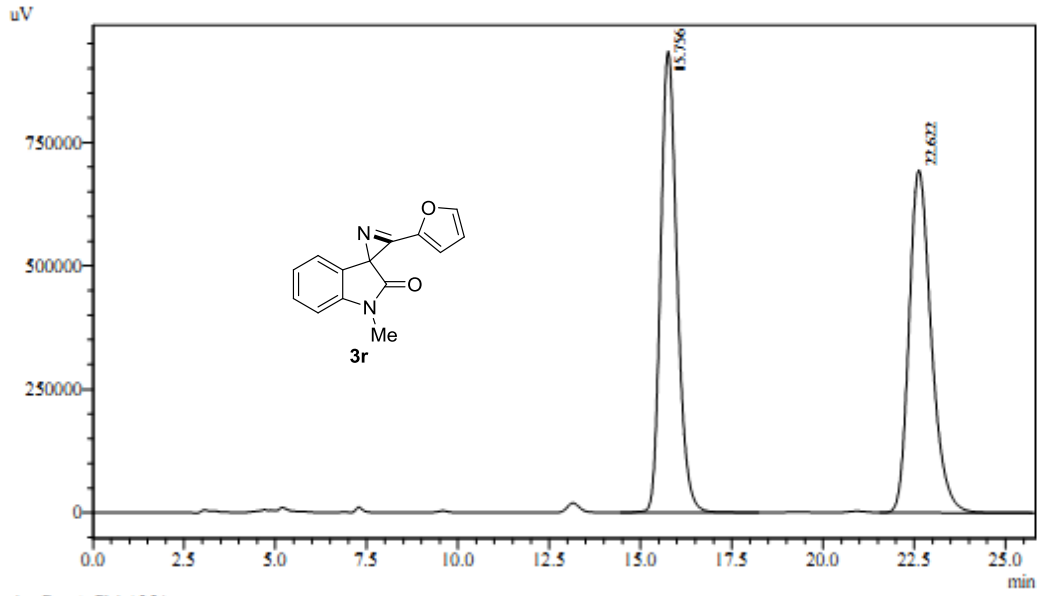

1 Det.A Ch1 / 254nm

Detector A Ch1 254nm

| Peak# | Ret. Time | Area     | Height  | Area %  | Height % |
|-------|-----------|----------|---------|---------|----------|
| 1     | 15.756    | 29351062 | 934265  | 49.958  | 57.399   |
| 2     | 22.622    | 29400153 | 693406  | 50.042  | 42.601   |
| Total |           | 58751215 | 1627672 | 100.000 | 100.000  |

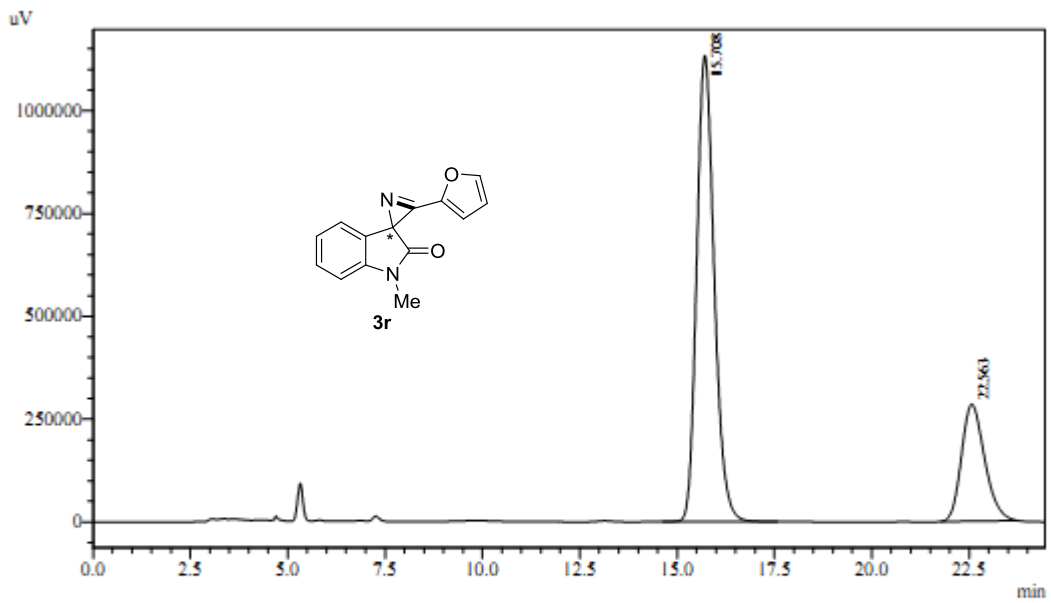

1 Det.A Ch1 / 254nm

Detector A Ch1 254nm

| Peak# | Ret. Time | Area     | Height  | Area %  | Height % |
|-------|-----------|----------|---------|---------|----------|
| 1     | 15.708    | 35682379 | 1132855 | 75.142  | 79.950   |
| 2     | 22.563    | 11804375 | 284091  | 24.858  | 20.050   |
| Total |           | 47486754 | 1416946 | 100.000 | 100.000  |

# <sup>1</sup>H NMR and <sup>13</sup>C NMR of compound 4

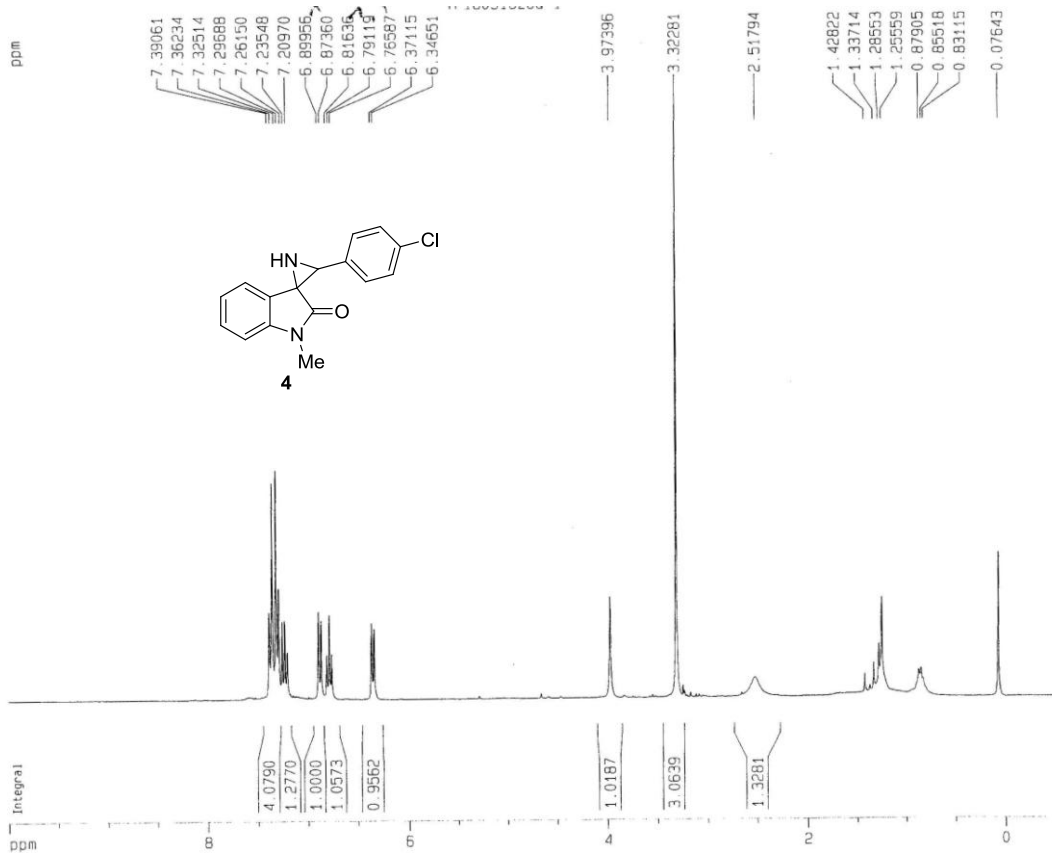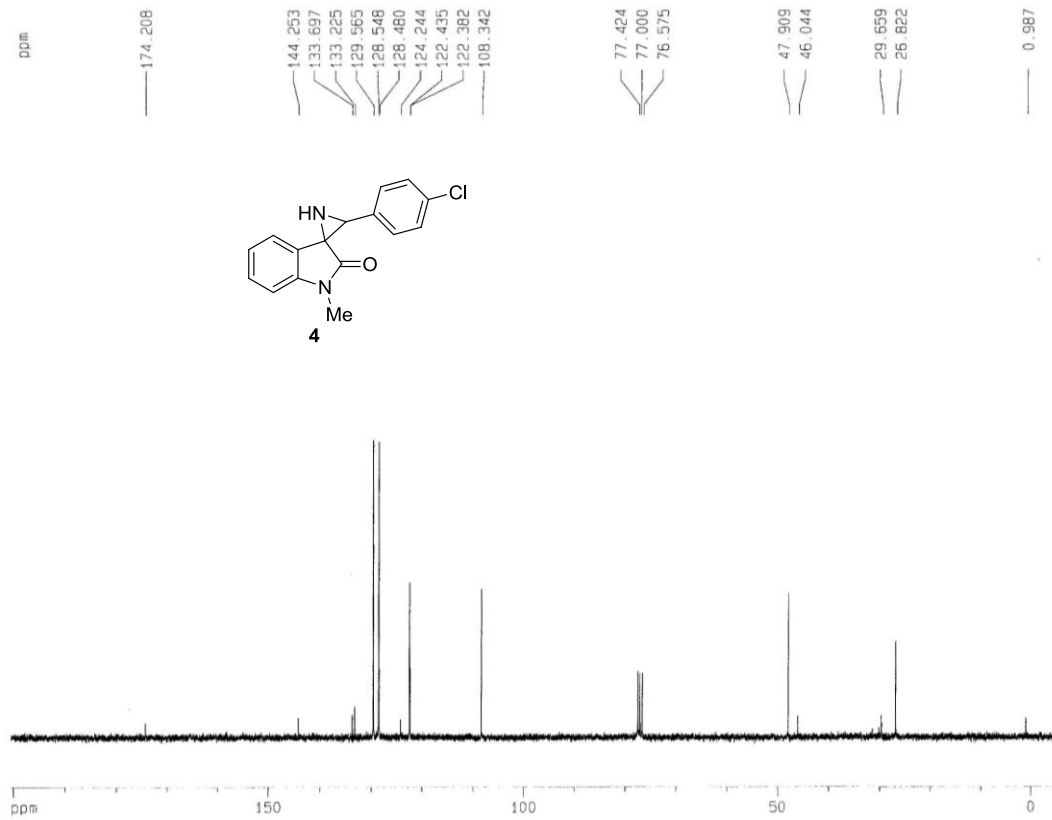

# <sup>1</sup>H NMR and <sup>13</sup>C NMR of compound 5

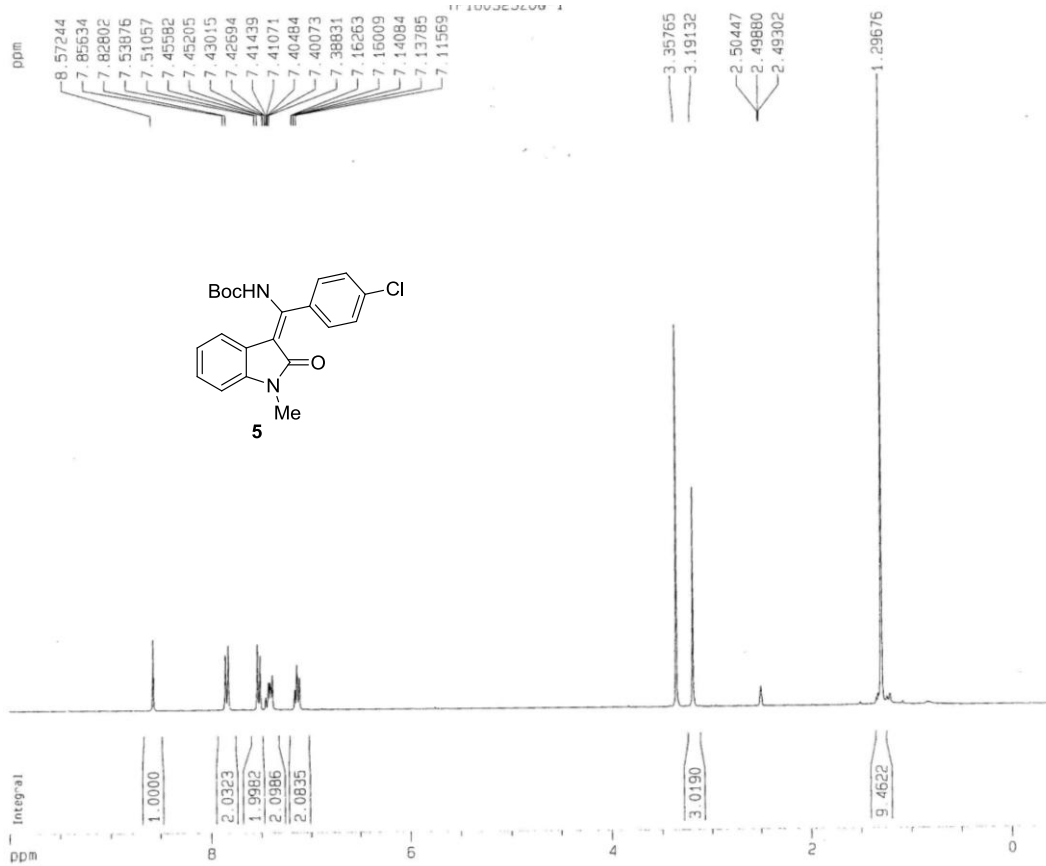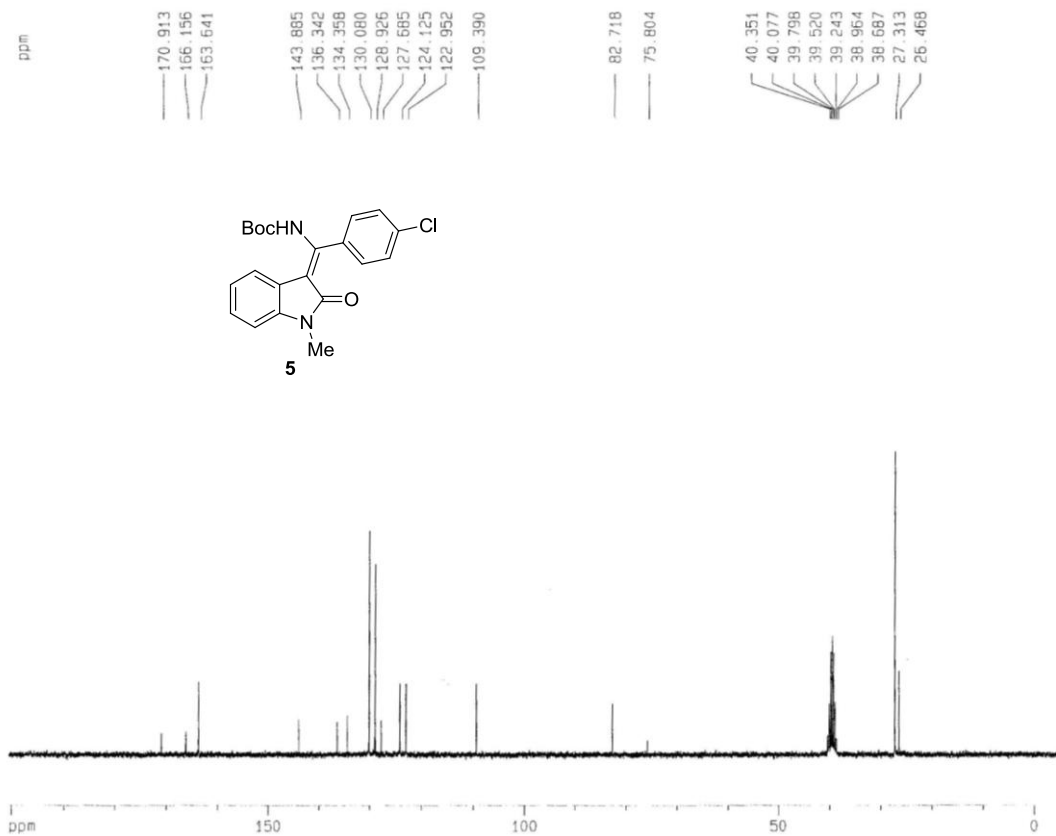

Supplement: c6ob02220k1.pdf [file c6ob02220k1.pdf]
